# Supplementary material for: Multi-colour circularly polarized luminescence properties of chiral Schiff-base boron difluoride complexes
Source: Royal Society of Chemistry journal article supplement (doi:10.1039/d2cp01861f), 2022-01-01
Supplement: d2cp01861f1.pdf [file d2cp01861f1.pdf]

## Supporting Information

### Multi-colour circularly polarized luminescence properties of chiral Schiff-base boron difluoride complexes

Masahiro Ikeshita,<sup>\*a</sup> Takato Suzuki,<sup>a</sup> Kana Matsudaira,<sup>b</sup> Maho Kitahara,<sup>b</sup> Yoshitane Imai<sup>\*b</sup> and Takashi Tsuno<sup>\*a</sup>

<sup>a</sup> Department of Applied Molecular Chemistry, College of Industrial Technology, Nihon University, Narashino, Chiba 275-8575, Japan

<sup>b</sup> Department of Applied Chemistry, Faculty of Science and Engineering, Kindai University 3-4-1 Kowakae, Higashi-Osaka, Osaka 577-8502, Japan

#### Table of Contents

1. Instrumentation and Materials
2. Synthetic Procedures and Characterization
3. Single X-ray Structure Analysis
4. Chiroptical Properties
5. Computational Details
6. Cartesian Coordinates (in Å)
7. References

#### 1. Instrumentation and Materials

Melting points were measured by a ATM-01 melting temperature measurement device (AS ONE Corporation). IR spectra were acquired with a JASCO FT/IR4100ST spectrometer. High-resolution mass spectra were recorded on Bruker micrOTOF II spectrometer. <sup>1</sup>H and <sup>13</sup>C NMR spectra were recorded on Bruker Avance 400 and Bruker Avance III 500 spectrometers, TMS as internal standard. Elemental analyses were performed on a J-SCIENCE SCIENCE SCIENCE MICRORECORDERJM10. UV-vis absorption spectra were obtained on a SHIMADZU UV-1900i spectrophotometer. CD spectra were recorded on a Jasco J-720 spectropolarimeter. Emission spectra were obtained on a FP-6500 spectrometer. CPL spectra were obtained at room temperature using a JASCO CPL-300 spectrofluoropolarimeter. Optical rotation was measured on a Jasco DIP-370 digital polarimeter.

(*R*)- and (*S*)-1-phenylethylamine (TCI), 1-hydroxy-2-naphthaldehyde (TCI), 2-hydroxy-1-naphthaldehyde (TCI), boron trifluoride- ethyl ether complex (TCI), and triethylamine (Fujifilm Wako) were obtained from commercial sources and were used without further purification. 2-Hydroxy-3-naphthaldehyde,<sup>S1</sup> 4-hydroxy-3-phenanthrenecarboxaldehyde<sup>S2</sup> and 3-hydroxy-2-anthracenecarboxaldehyde<sup>S3</sup> were prepared by according publish procedure.

## 2. Synthetic Procedures and Characterization

### General procedure for ligands

The ligands were prepared by condensation of corresponding aldehyde with (*R*)/(*S*)-1-phenylethylamine in boiling ethanol. The spectral data of **2a** and **2b** were corresponded with published papers.<sup>S4</sup> The physical properties and spectroscopic data of the ligands (*R*)/(*S*)-**2c–e** are as follows.

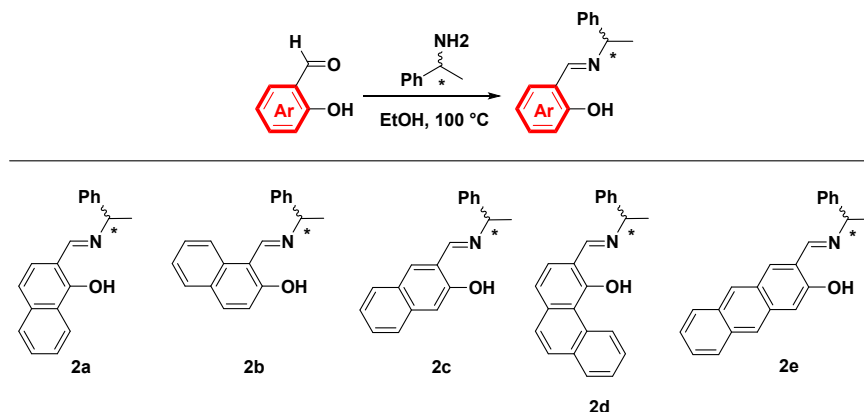

**2-[[[(1*R* or 1*S*)-1-Phenylethyl]imino]methyl]-3-naphthalenol ((*R*)- and (*S*)-**2c**):** Yellow solid (61%); m.p. 148–150 °C; IR (KBr):  $\nu = 1631 \text{ cm}^{-1}$  (N=C);  $^1\text{H NMR}$  (500 MHz,  $\text{CDCl}_3$ )  $\delta = 13.03$  (br s, 1H), 8.57 (br s, 1H), 7.77 (s,  $J = 8.4$  Hz, 1H), 7.75 (d,  $J = 8.2$  Hz, 1H), 7.68 (d,  $J = 8.2$  Hz), 7.45 (ddd,  $J = 8.2, 6.9, 1.3$  Hz, 1H), 7.41–7.35 (m, 4H), 7.30–7.26 (m, 3H), 4.44 (q,  $J = 6.6$  Hz, 1H), 1.67 ppm (t,  $J = 6.6$  Hz, 3H);  $^{13}\text{C NMR}$  (125 MHz,  $\text{CDCl}_3$ )  $\delta = 163.4, 156.9, 143.6, 135.9, 133.1, 128.7, 128.3, 128.1, 127.4, 127.3, 126.5, 126.3, 123.4, 121.2, 110.9, 68.9, 24.9$  ppm; HRMS (APCI+):  $m/z$  [ $M + H$ ]<sup>+</sup> calcd for  $\text{C}_{19}\text{H}_{18}\text{NO}$ : 276.1383; found: 276.1388.

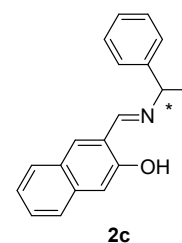

**2c**

**3-[[[(1*R* or 1*S*)-1-Phenylethyl]imino]methyl]-4-phenanthrenol ((*R*)- and (*S*)-**2d**):** Yellow solid (82%); m.p. 120–121 °C; IR (KBr):  $\nu = 1600 \text{ cm}^{-1}$  (N=C);  $^1\text{H NMR}$  (400 MHz,  $\text{CDCl}_3$ )  $\delta = 15.60$  (br s, 1H, OH), 10.18 (d,  $J = 8.0$  Hz, 1H), 8.34 (s, 1H), 7.79 (d,  $J = 8.0$  Hz, 1H), 7.72 (d,  $J = 6.4$  Hz, 1H), 7.69–7.59 (m, 1H), 7.52–7.48 (m, 1H), 7.38–7.26 (m, 1H), 7.28–7.20 (m, 1H), 7.04 (d,  $J = 8.4$  Hz, 1H), 4.70 (q,  $J = 6.6$  Hz, 1H), 1.72 ppm (t,  $J = 6.6$  Hz, 3H);  $^{13}\text{C NMR}$  (100 MHz,  $\text{CDCl}_3$ )  $\delta = 169.1, 163.0, 142.9, 137.2, 132.3, 131.7, 129.0, 128.9, 128.20, 128.19, 127.6, 127.2, 126.9, 126.4$  (2C), 125.7, 121.3, 117.5, 113.9, 65.1, 24.4 ppm; HRMS (ESI+):  $m/z$  [ $M^+$ ] calcd for  $\text{C}_{23}\text{H}_{20}\text{NO}$ : 326.1539; found: 326.1538.

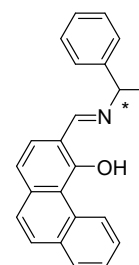

**2d**

**2-[[[(1*R* or 1*S*)-1-Phenylethyl]imino]methyl]-3-anthracenol ((*R*)- and (*S*)-**2e**):** Orange solid (90%); m.p. 263–271 °C; IR (KBr):  $\nu = 1639 \text{ cm}^{-1}$  (N=C);  $^1\text{H NMR}$  (500 MHz,  $\text{CDCl}_3$ )  $\delta = 12.86$  (br s, 1H, OH), 8.63 (s, 1H), 8.38 (s, 1H), 8.22 (s, 1H), 8.01 (s, 1H), 7.92 (t,  $J = 8.2$  Hz, 2H), 7.46–7.36 (m, 7H), 7.31–7.28 (m, 1H), 4.65 (q,  $J = 6.6$  Hz, 1H), 1.70 ppm (t,  $J = 6.6$  Hz, 3H);  $^{13}\text{C NMR}$  (125 MHz,  $\text{CDCl}_3$ )  $\delta = 163.4, 163.0, 155.5, 143.6, 134.7, 133.4, 133.3, 130.2, 128.8, 128.4, 127.70, 127.65, 127.4, 126.8, 126.5, 126.3, 124.5, 123.6, 108.9, 69.0, 24.8$  ppm; HRMS (APCI+):  $m/z$  [ $M + H$ ]<sup>+</sup> calcd for  $\text{C}_{19}\text{H}_{20}\text{NO}$ : 326.1539; found: 326.1561.

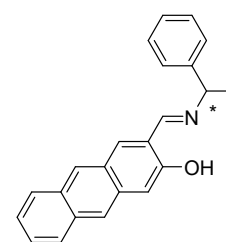

**2e**

## General procedure for boron complexes

A solution of corresponding chiral ligands (1 equiv.) in 1,2-dichloroethane was added triethylamine (4 equiv.) and boron trifluoride-ethyl ether complex (4 equiv.) The mixture was refluxed under nitrogen atmosphere for overnight. After that, the mixture was poured into water, and was extracted with dichloromethane, followed by drying over anhydrous  $\text{MgSO}_4$ . After the removal of the solvent, the crude product was purified by column chromatography ( $\text{SiO}_2$ ) using dichloromethane as the eluent. After recrystallization from  $\text{CH}_2\text{Cl}_2/\text{EtOH}$ , (*R*)/(*S*)-**1a–e** were obtained in moderate yields (44–83%).

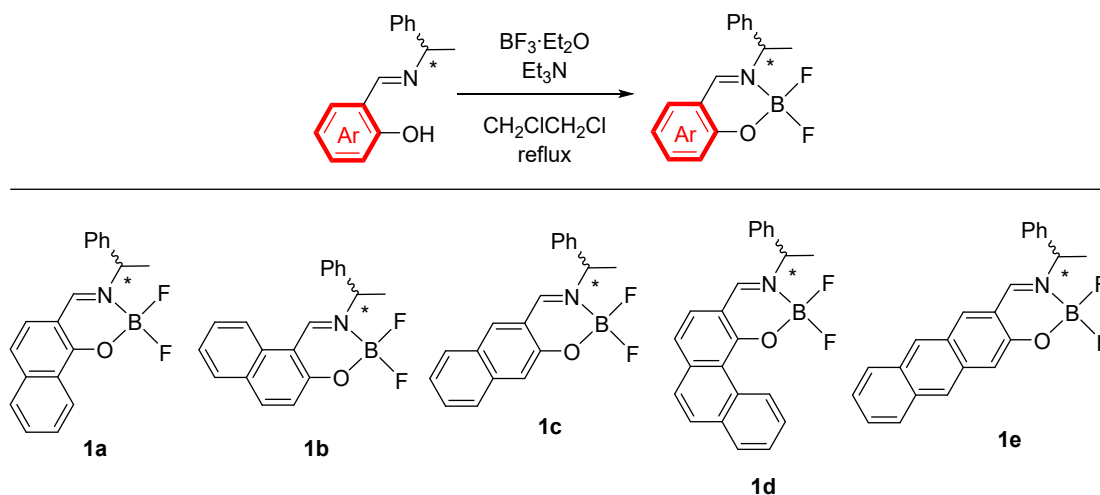

**(*R*)/(*S*)-1a:** Yellow crystals (83%); m.p. 122–123 °C; IR (KBr):  $\nu = 1628 \text{ cm}^{-1}$  (N=C);  $^1\text{H}$  NMR ( $\text{CDCl}_3$ , 500 MHz)  $\delta = 8.58$  (dd,  $J = 7.9, 0.9$  Hz, 1H), 8.07 (br, 1H), 7.73 (d,  $J = 7.9$  Hz, 1H), 7.65 (ddd,  $J = 8.2, 7.0, 1.6$  Hz, 1H), 7.55 (ddd,  $J = 8.4, 7.0, 1.3$  Hz, 1H), 7.52–7.47 (m, 2H), 7.47–7.42 (m, 2H), 7.41–7.34 (m, 1H), 7.26 (d,  $J = 8.8$  Hz, 1H), 7.13 (d,  $J = 8.8$  Hz, 1H), 5.48 (q,  $J = 6.9$  Hz, 1H), 1.90 ppm (d,  $J = 6.9$  Hz, 3H);  $^{13}\text{C}$  NMR ( $\text{CDCl}_3$ , 125 MHz)  $\delta = 162.5, 159.1, 139.0, 138.3, 130.9, 129.2, 128.7, 128.0, 127.5, 126.4, 125.3, 125.1, 124.9, 119.8, 58.5, 20.7$  ppm; HRMS (APCI+):  $m/z$   $[\text{M}]^+$  calcd for  $\text{C}_{19}\text{H}_{16}\text{NOB}$ : 323.1291; found: 323.1320; Anal. calcd for  $\text{C}_{19}\text{H}_{16}\text{NOB}$ : C, 70.62; H, 4.99; N, 4.33. Found: C, 70.72; H, 4.97; N, 4.34. (*S*)-**1a**:  $[\alpha]_{\text{D}}^{25} = +38$  (c 0.001,  $\text{CHCl}_3$ ).

**(*R*)/(*S*)-1b:** Yellow crystals (81%); m.p. 196–198 °C; IR (KBr):  $\nu = 1620 \text{ cm}^{-1}$  (N=C).  $^1\text{H}$  NMR ( $\text{CDCl}_3$ , 500 MHz)  $\delta = 8.76$  (br, 1H), 8.01 (d,  $J = 9.1$  Hz, 1H), 7.77 (dd,  $J = 7.9, 0.9$  Hz, 1H), 7.65 (d,  $J = 8.2$ , 1H), 7.54–7.50 (m, 3H), 7.48–7.45 (m, 2H), 7.42–7.38 (m, 2H), 7.24 (d,  $J = 9.1$  Hz, 1H), 5.51 (q,  $J = 6.9$  Hz, 1H), 1.93 ppm (d,  $J = 6.9$  Hz, 3H);  $^{13}\text{C}$  NMR ( $\text{CDCl}_3$ , 125 MHz)  $\delta = 161.1, 158.1, 139.8, 139.0, 131.2, 129.5, 129.3, 129.0, 128.9, 128.0, 127.9, 124.7, 120.50, 120.46, 118.7, 59.1, 20.9$  ppm; HRMS (APCI+):  $m/z$   $[\text{M}]^+$  calcd for  $\text{C}_{19}\text{H}_{16}\text{NOB}$ : 323.1291, found: 373.1286; Anal. calcd for  $\text{C}_{19}\text{H}_{16}\text{NOB}$ : C, 70.62; H, 4.99; N, 4.33. Found: C, 70.71; H, 5.00; N, 4.36. (*S*)-**1b**:  $[\alpha]_{\text{D}}^{25} = -200$  (c 0.001,  $\text{CHCl}_3$ ).

**(R)/(S)-1c:** Yellow crystals (58%); m.p. 229–230 °C; IR (KBr):  $\nu = 1647 \text{ cm}^{-1}$  (N=C);  $^1\text{H}$  NMR ( $\text{CDCl}_3$ , 500 MHz)  $\delta = 8.20$  (br, 1H), 7.87 (s, 1H), 7.75–7.69 (m, 2H), 7.55–7.44 (m, 5H), 7.43–7.38 (m, 2H), 7.31 (ddd,  $J = 8.3, 7.0, 1.1 \text{ Hz}$ , 1H), 5.56 (q,  $J = 6.9 \text{ Hz}$ , 1H), 1.92 ppm (d,  $J = 6.9 \text{ Hz}$ , 3H);  $^{13}\text{C}$  NMR ( $\text{CDCl}_3$ , 125 MHz)  $\delta = 163.8, 152.7, 139.4, 138.3, 130.1, 129.3, 128.2, 127.0, 124.4, 113.8, 59.5, 20.5 \text{ ppm}$ ; HRMS (APCI+):  $m/z$   $[\text{M}]^+$  calcd for  $\text{C}_{19}\text{H}_{16}\text{NOB}$ : 323.1291; found: 323.1274; Anal. calcd for  $\text{C}_{19}\text{H}_{16}\text{NOB}$ : C, 70.62; H, 4.99; N, 4.33. Found: C, 70.66; H, 4.96; N, 4.41. (*S*)-**1c**:  $[\alpha]_{\text{D}}^{25} = +2$  (c 0.001,  $\text{CHCl}_3$ ).

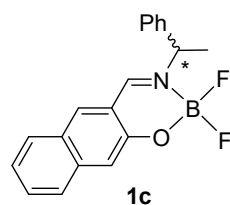

**(R)/(S)-1d:** Yellow crystals (69%); m.p. 184–185 °C; IR (KBr):  $\nu = 1639 \text{ cm}^{-1}$  (N=C);  $^1\text{H}$  NMR ( $\text{CDCl}_3$ , 500 MHz)  $\delta = 10.05$  (d,  $J = 8.5 \text{ Hz}$ , 1H), 8.12 (br, 1H), 7.90 (ddd,  $J = 9.1, 9.1, 0.6 \text{ Hz}$ , 1H), 7.78 (ddd,  $J = 8.5, 7.0, 1.2 \text{ Hz}$ , 1H), 7.65 (ddd,  $J = 8.0, 7.3 \text{ Hz}$ , 1H), 7.52 (d,  $J = 7.6 \text{ Hz}$ , 2H), 7.49–7.42 (m, 2H), 7.42–7.33 (m, 2H), 7.30 (d,  $J = 8.5 \text{ Hz}$ , 1H), 5.63–5.46 (q,  $J = 7.3 \text{ Hz}$ , 1H), 1.94 ppm (d,  $J = 7.3 \text{ Hz}$ , 3H);  $^{13}\text{C}$  NMR ( $\text{CDCl}_3$ , 125 MHz)  $\delta = 162.7, 140.2, 138.9, 132.8, 132.5, 130.9, 129.2, 128.8, 128.7, 128.4, 128.0, 127.5, 126.8, 126.4, 120.8, 58.7, 20.7 \text{ ppm}$ ; HRMS (APCI+):  $m/z$   $[\text{M}]^+$  calcd for  $\text{C}_{23}\text{H}_{18}\text{NOB}$ : 373.1448; found: 373.1477; Anal. calcd for  $\text{C}_{23}\text{H}_{18}\text{NOB}$ : C, 74.02; H, 4.86; N, 3.75. Found: C, 74.14; H, 4.80; N, 3.79. (*S*)-**1d**:  $[\alpha]_{\text{D}}^{25} = -274$  (c 0.001,  $\text{CHCl}_3$ ).

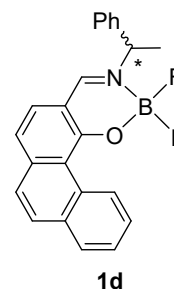

**(R)/(S)-1e:** red solid (44%); m.p. 297–301 °C; IR (KBr):  $\nu = 1643 \text{ cm}^{-1}$  (N=C);  $^1\text{H}$  NMR ( $\text{CDCl}_3$ , 500 MHz)  $\delta = 8.39$  (s, 1H), 8.27 (s, 1H), 8.24 (br, 1H), 8.14 (s, 1H), 7.87 (s, 1H), 7.91 (d,  $J = 9.8 \text{ Hz}$ , 1H), 7.53–7.50 (m, 3H), 7.50–7.46 (m, 3H), 7.45–7.38 (m, 2H), 5.60 (q,  $J = 7.3 \text{ Hz}$ , 1H), 1.94 (d,  $J = 7.3 \text{ Hz}$ , 3H);  $^{13}\text{C}$  NMR ( $\text{CDCl}_3$ , 125 MHz)  $\delta = 159.3, 138.3, 137.2, 138.3, 134.6, 133.0, 130.6, 129.4, 129.3, 129.1, 128.7, 128.2, 127.9, 127.6, 127.5, 126.9, 126.5, 125.3, 124.6, 120.2, 59.7, 20.5 \text{ ppm}$ ; HRMS (APCI+):  $m/z$   $[\text{M}]^+$  calcd for  $\text{C}_{23}\text{H}_{18}\text{NOB}$ : 373.1448; found: 373.1477; (*S*)-**1e**:  $[\alpha]_{\text{D}}^{25} = +70$  (c 0.00044,  $\text{CHCl}_3$ ).

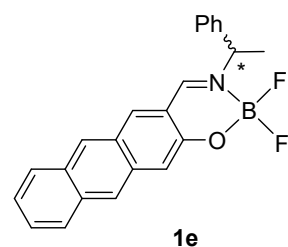

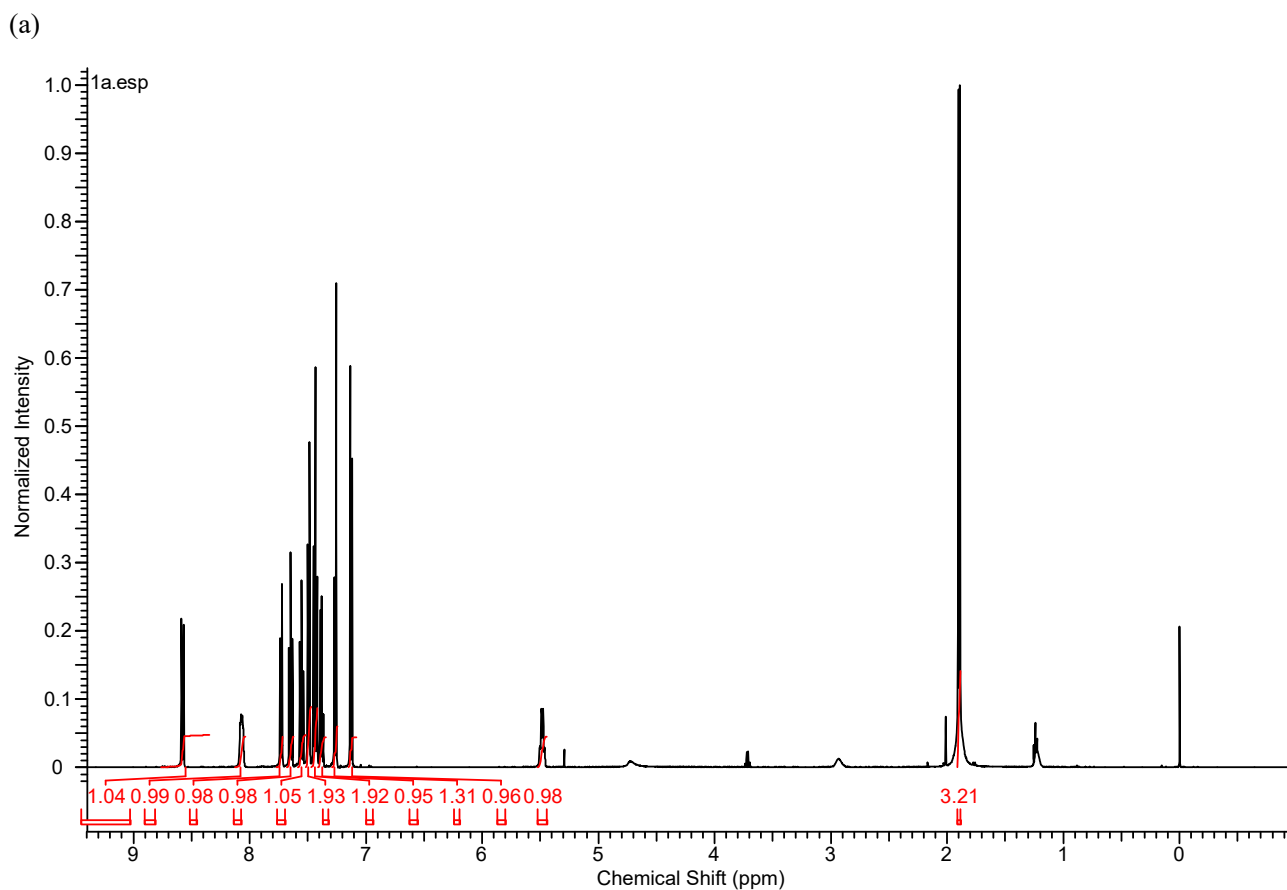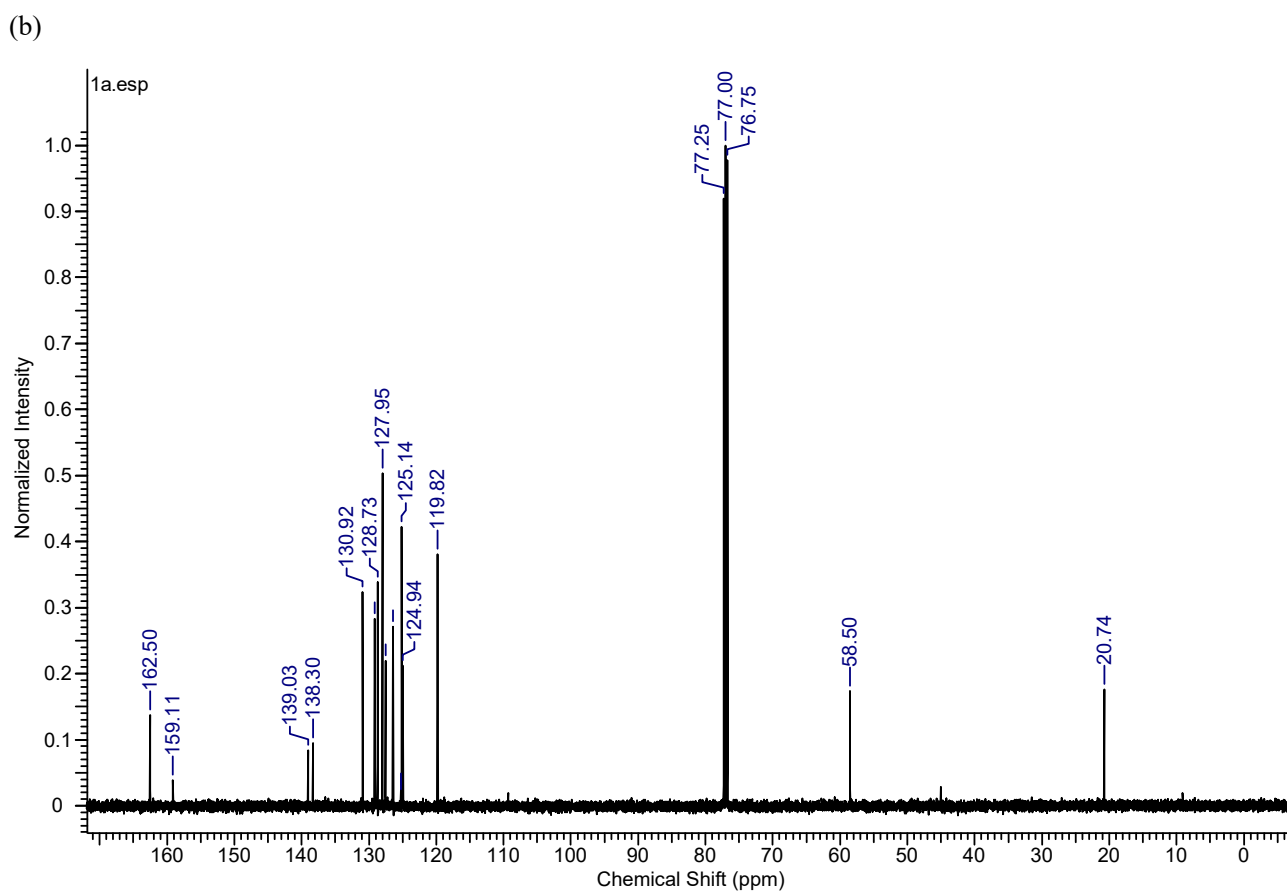

**Fig. S1** (a)  $^1\text{H}$  and (b)  $^{13}\text{C}$  NMR spectra of (*S*)-**1a** in  $\text{CDCl}_3$ .

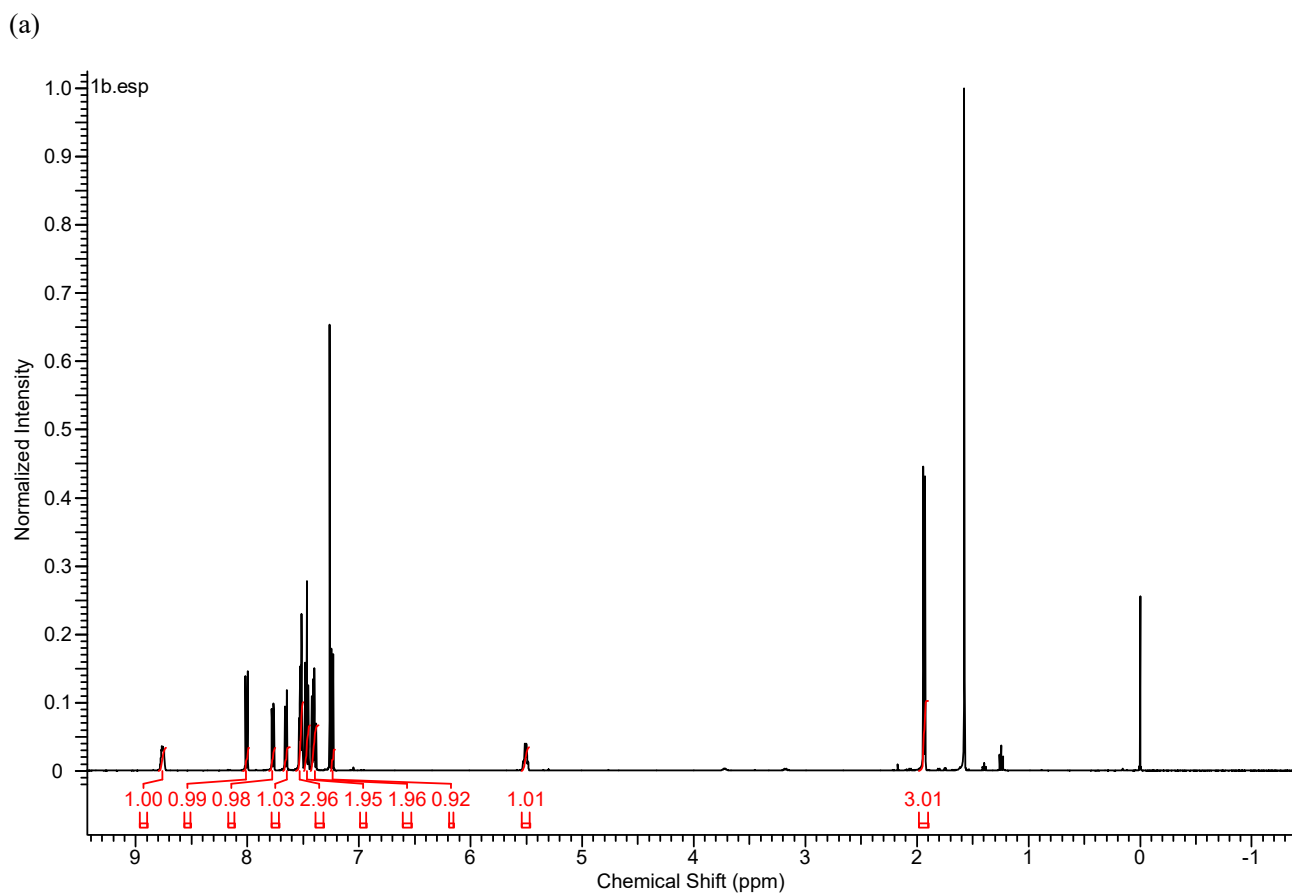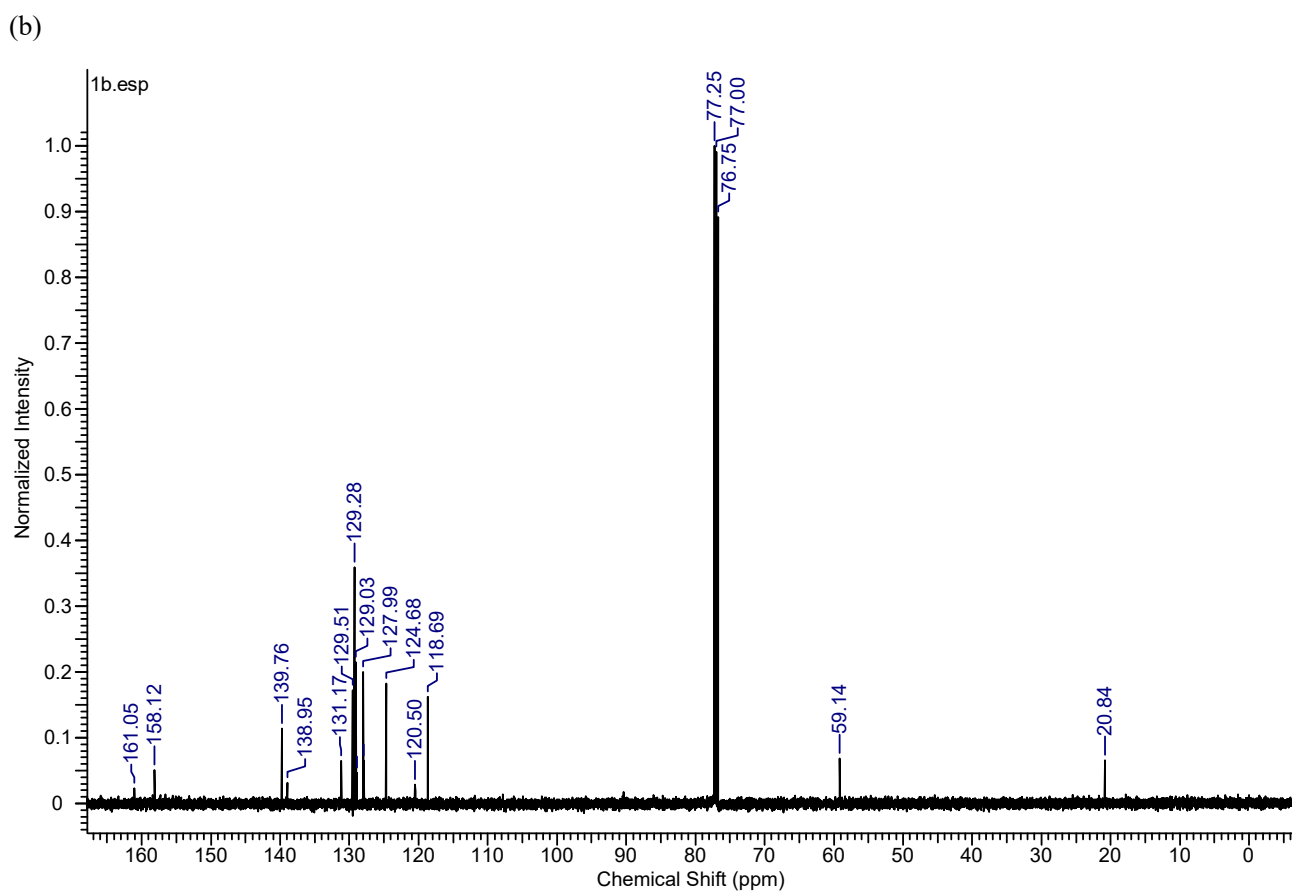

**Fig. S2** (a)  $^1\text{H}$  and (b)  $^{13}\text{C}$  NMR spectra of (*S*)-**1b** in  $\text{CDCl}_3$ .

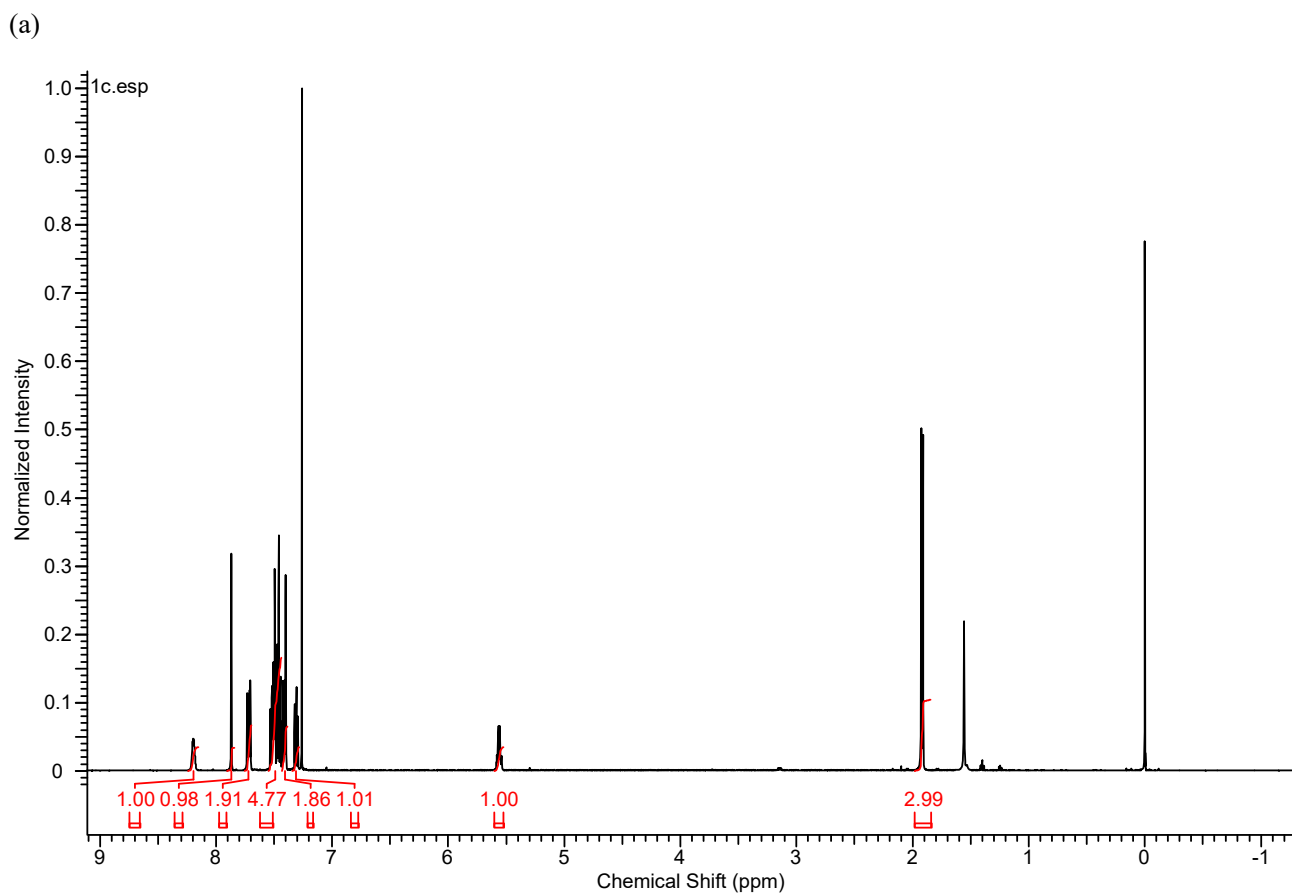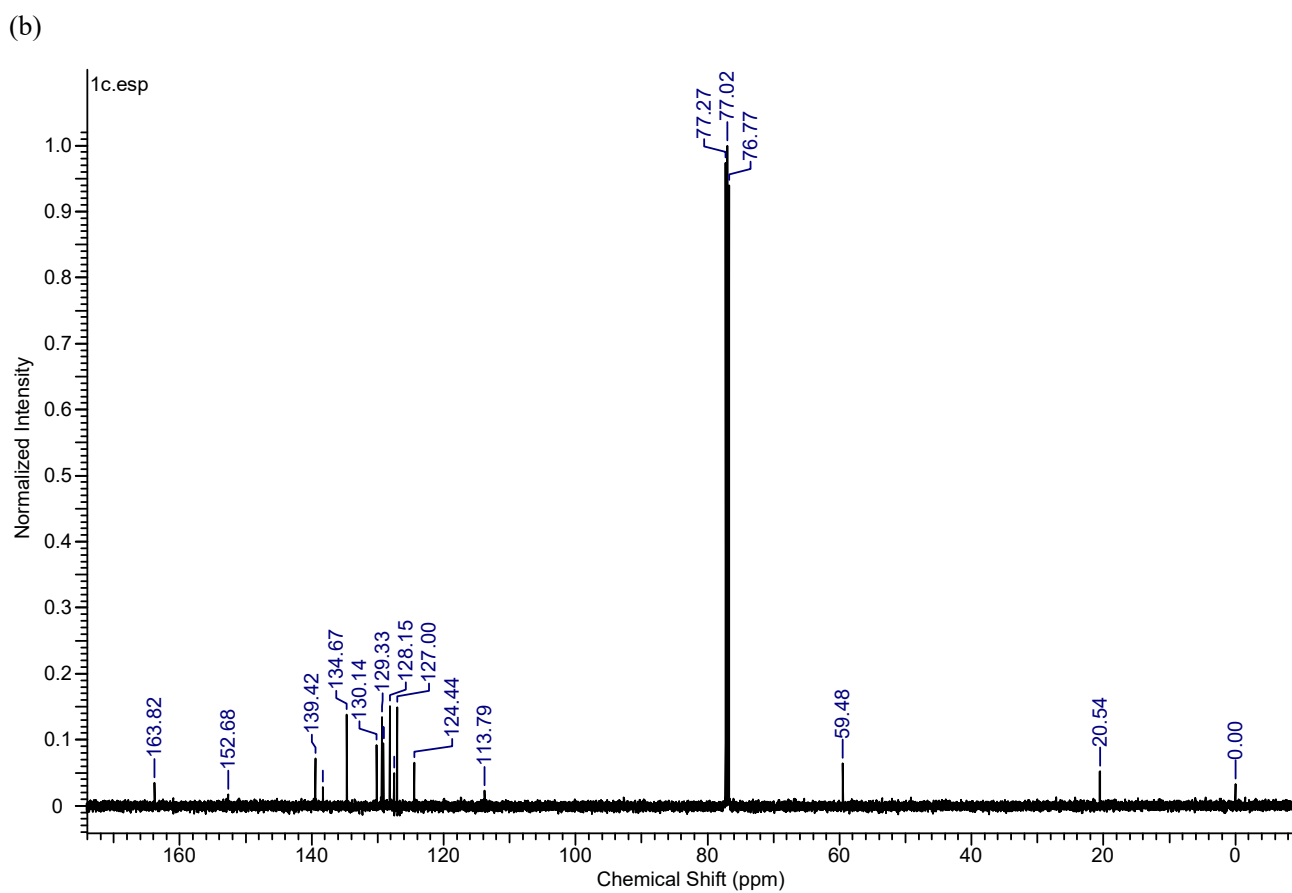

**Fig. S3** (a)  $^1\text{H}$  and (b)  $^{13}\text{C}$  NMR spectra of (*S*)-**1c** in  $\text{CDCl}_3$ .

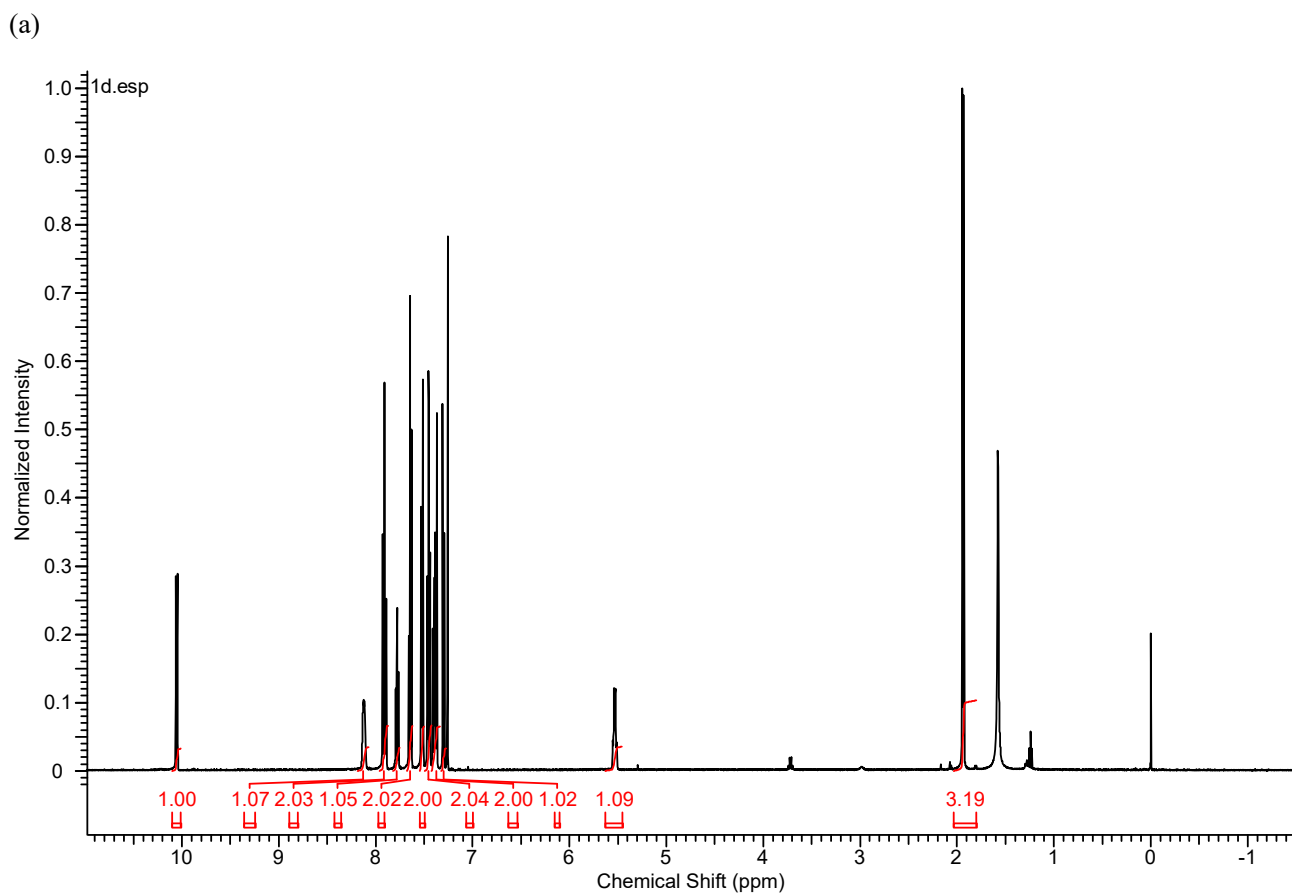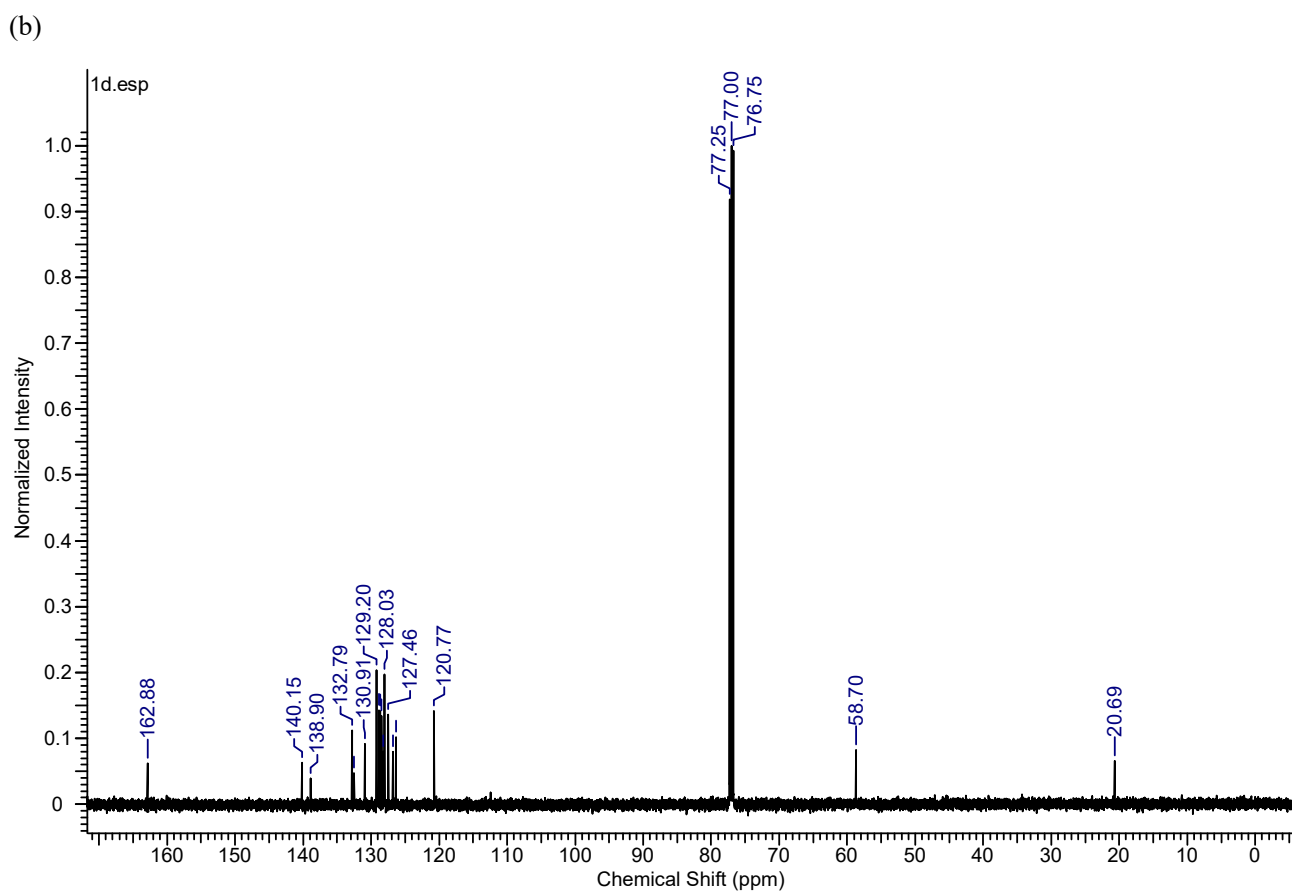

**Fig. S4** (a)  $^1\text{H}$  and (b)  $^{13}\text{C}$  NMR spectra of (*S*)-**1d** in  $\text{CDCl}_3$ .



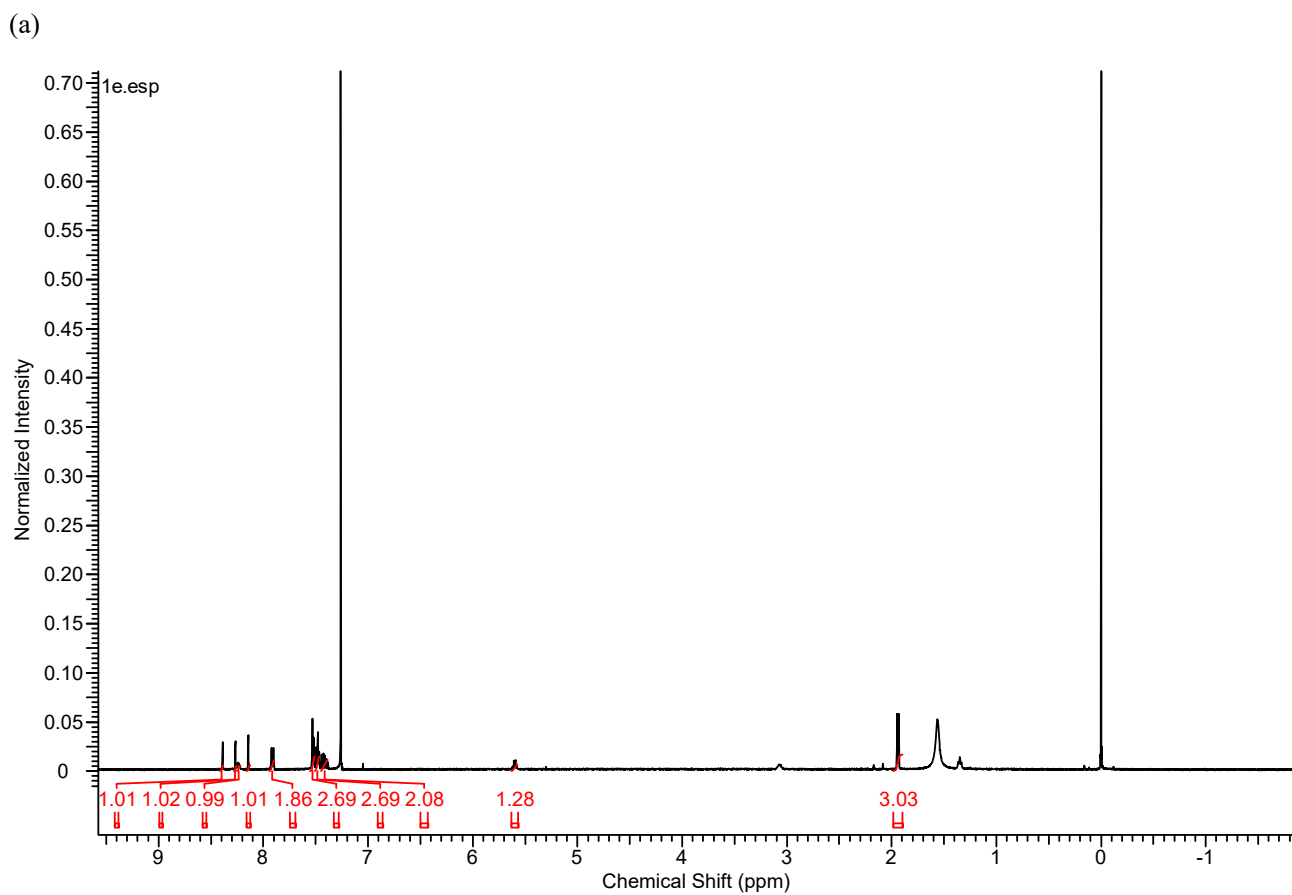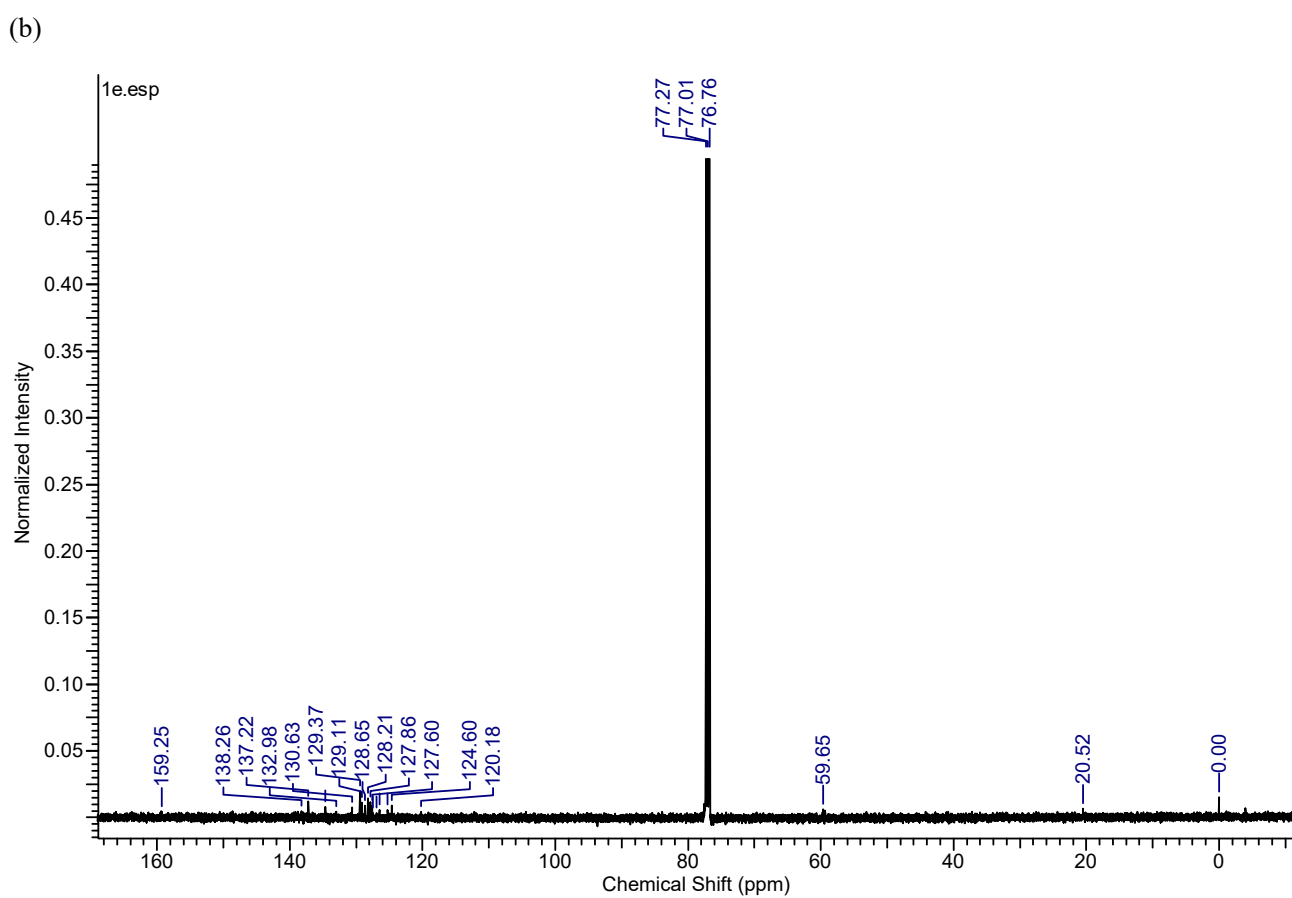

**Fig. S5** (a)  $^1\text{H}$  and (b)  $^{13}\text{C}$  NMR spectra of (*S*)-**1e** in  $\text{CDCl}_3$ .

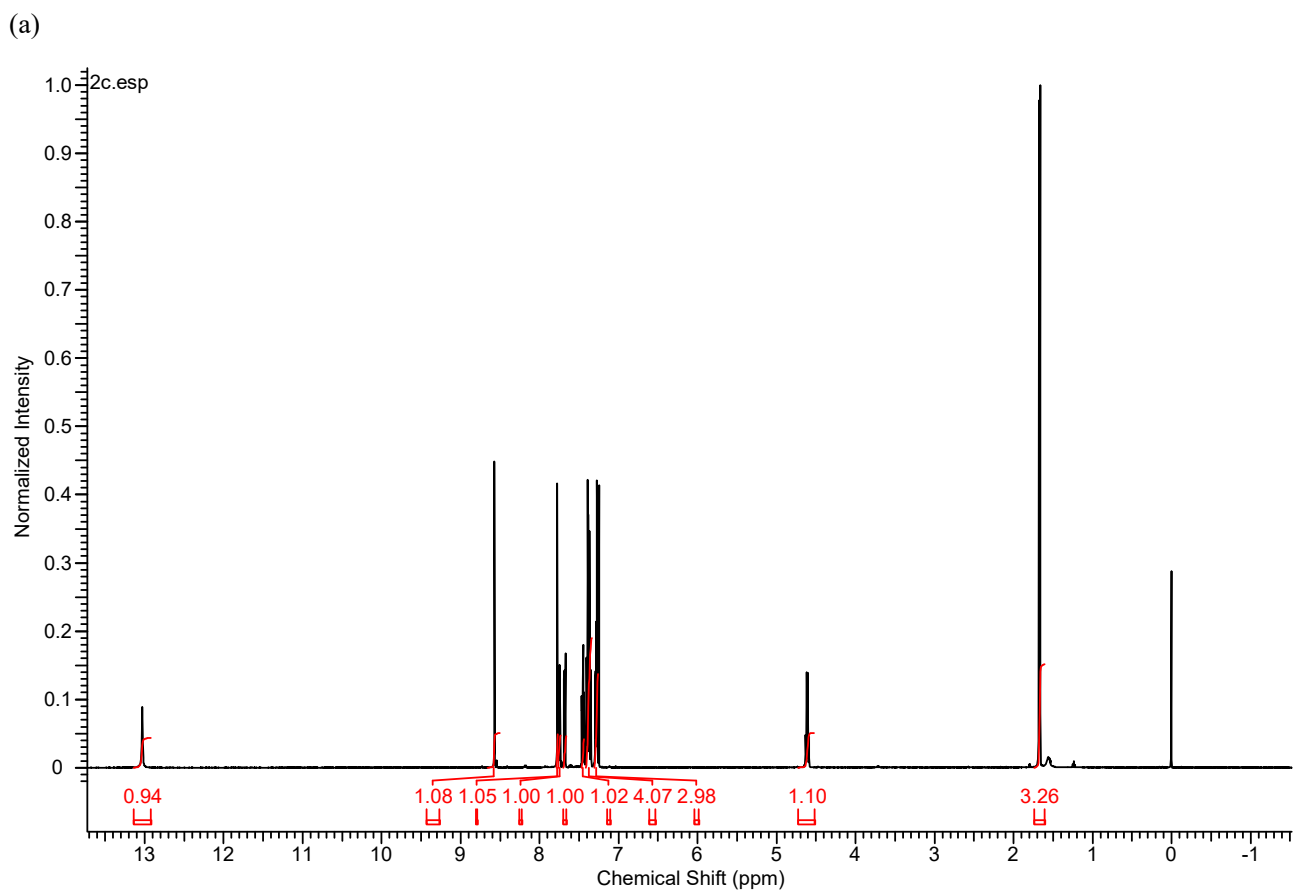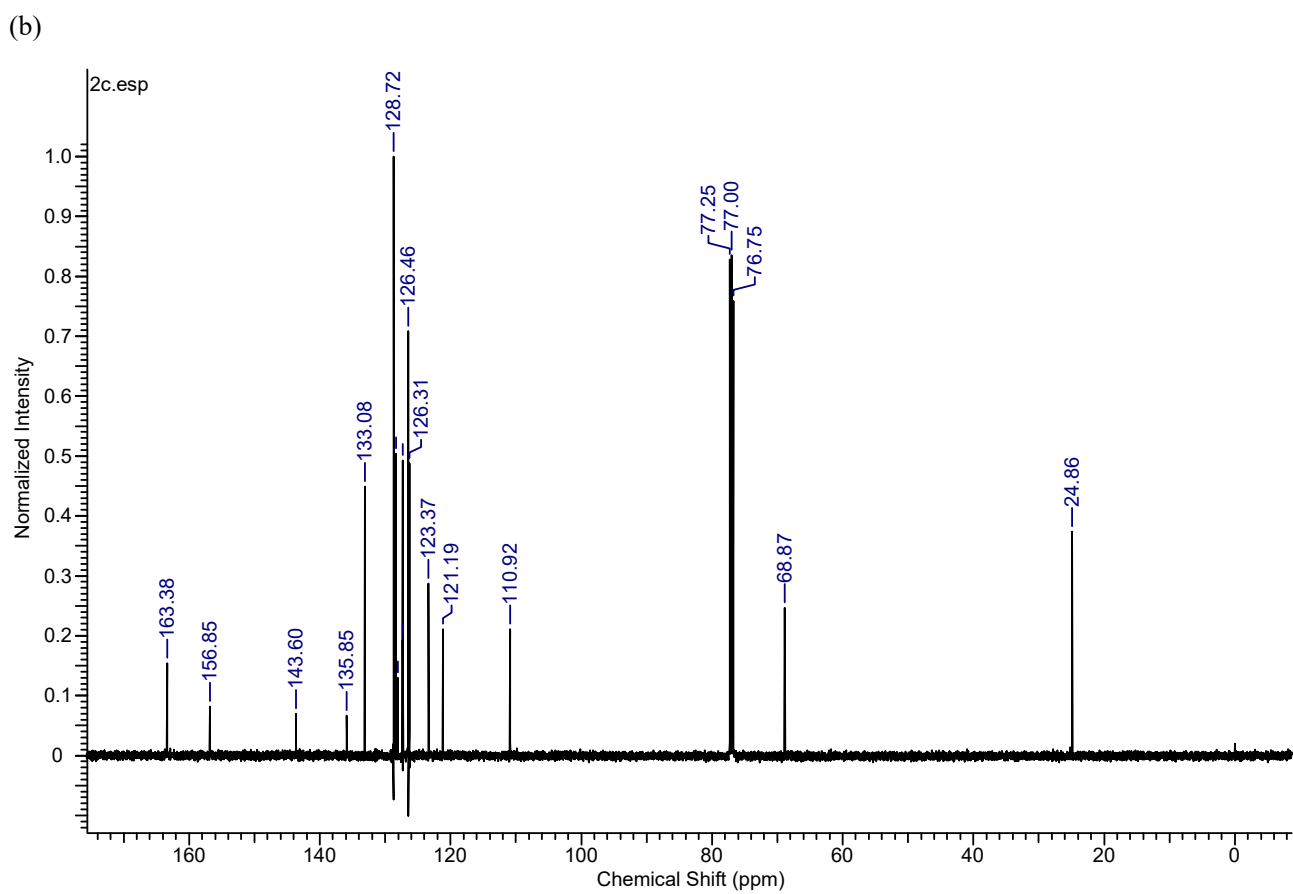

**Fig. S6** (a)  $^1\text{H}$  and (b)  $^{13}\text{C}$  NMR spectra of (*S*)-**2c** in  $\text{CDCl}_3$ .

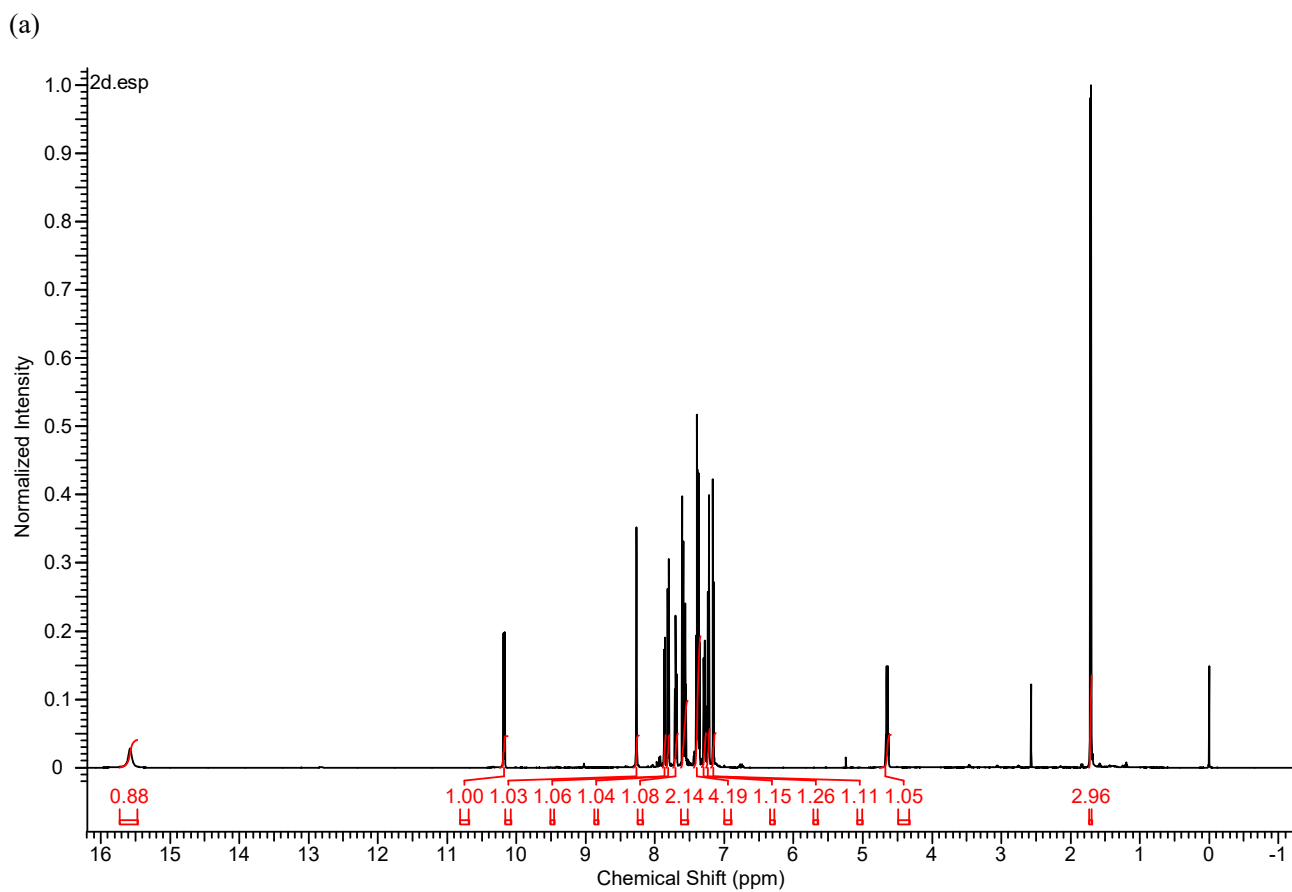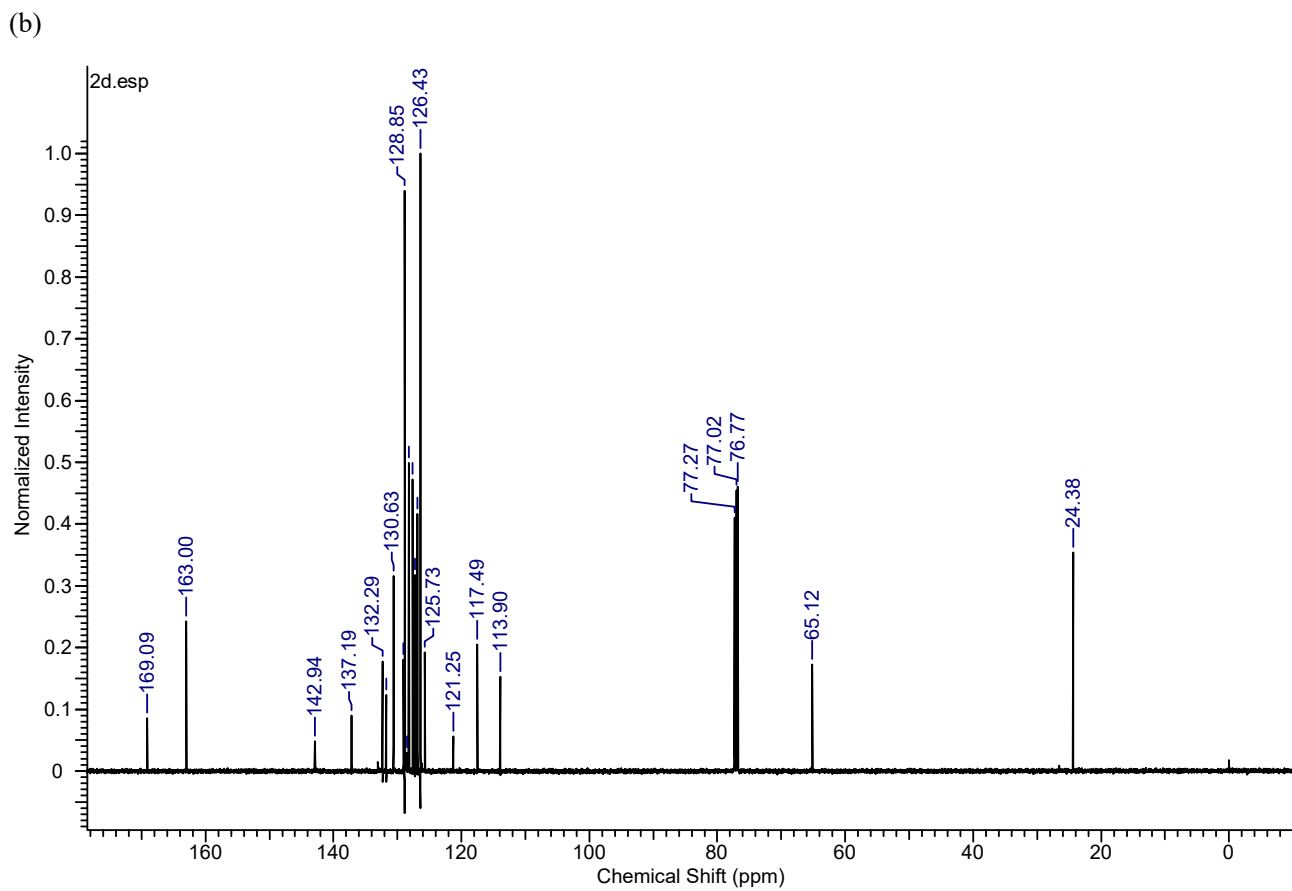

Fig. S7 (a)  $^1\text{H}$  and (b)  $^{13}\text{C}$  NMR spectra of (*S*)-**2d** in  $\text{CDCl}_3$ .

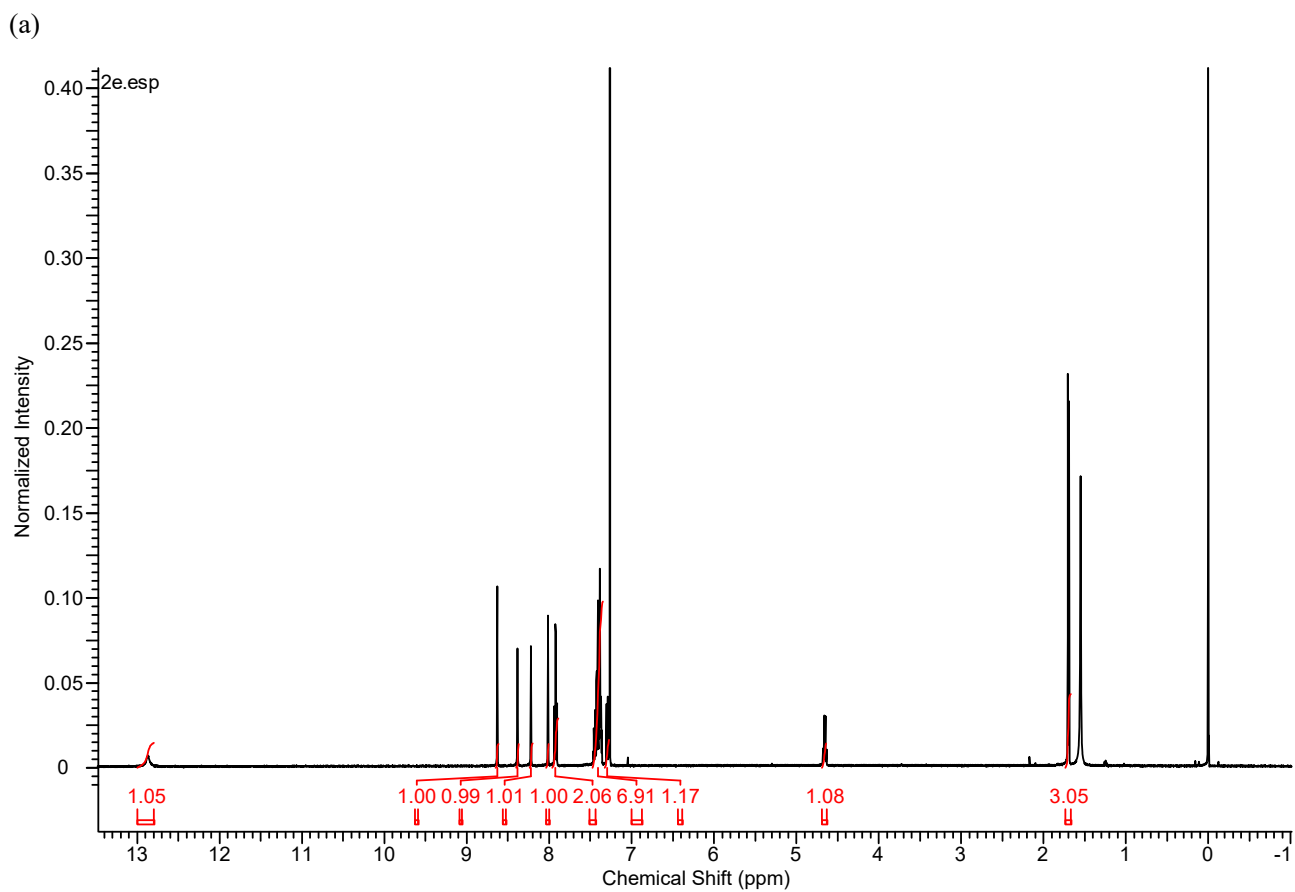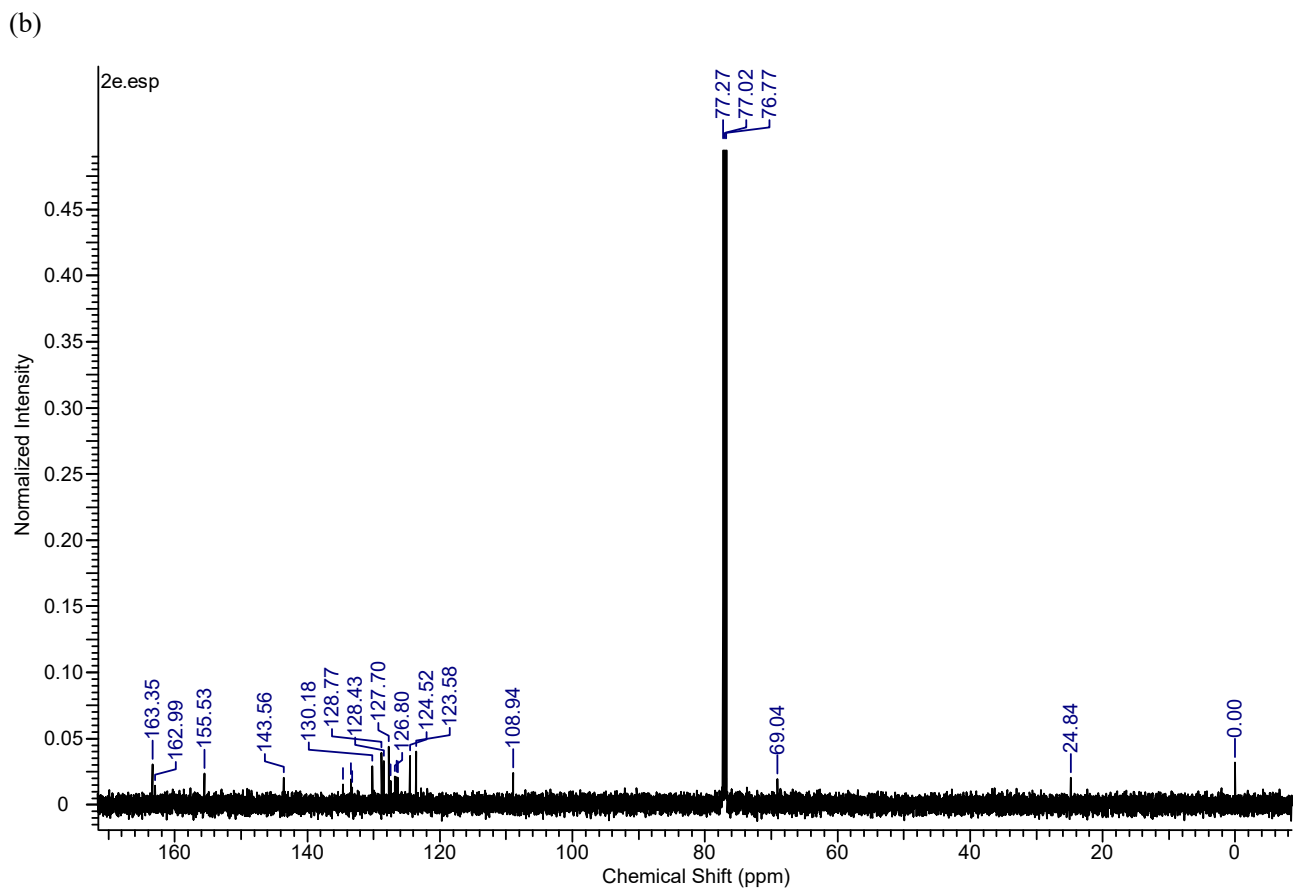

**Fig. S8** (a)  $^1\text{H}$  and (b)  $^{13}\text{C}$  NMR spectra of (*S*)-**2e** in  $\text{CDCl}_3$ .

### 3. Single X-ray Structure Analysis

Crystals suitable for XRD studies were analyzed using Rigaku RAXIS-RAPID imaging plate diffractometer using Mo- $K_{\alpha}$  radiation (graphite monochromated,  $\lambda = 0.71073 \text{ \AA}$ , fine focus tube,  $\omega$ -scan) and Rigaku XtaLAB mini2 benchtop X-ray crystallography system equipped with a Mo rotating-anode X-ray generator with monochromated Mo- $K_{\alpha}$  radiation ( $\lambda = 0.71073 \text{ \AA}$ ). The molecular structures and packings in crystals (*S*)-**1a–d** were solved by direct methods and refined using the full-matrix least-squares method. In subsequent refinements, the function  $\Sigma\omega(F_o^2 - F_c^2)^2$  was minimized, where  $F_o$  and  $F_c$  are the observed and calculated structure factor amplitudes, respectively. The positions of non-hydrogen atoms were found from difference Fourier electron density maps and refined anisotropically. All calculations were performed using the Crystal Structure crystallographic or CrysAlisPro program software package, and illustrations were drawn by using ORTEP.

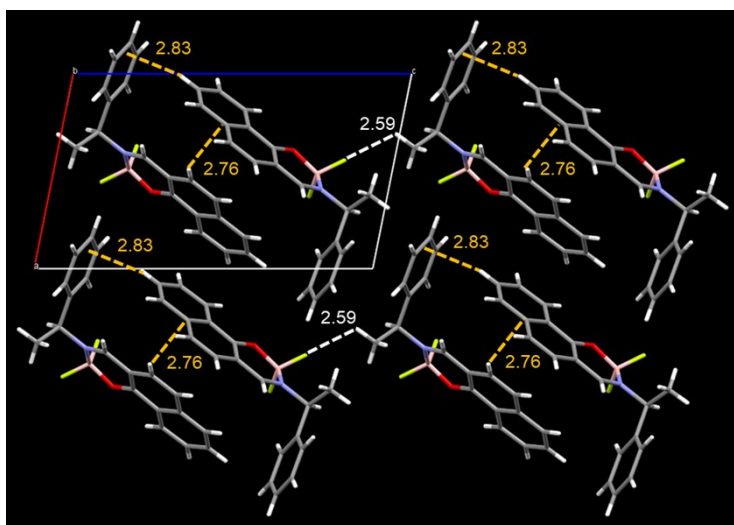

**Fig. S9** Packing structure of (*S*)-**1a**. The *b*-axis projections showing CH- $\pi$  (orange broken lines) and H $\cdots$ F (white broken lines) interactions.

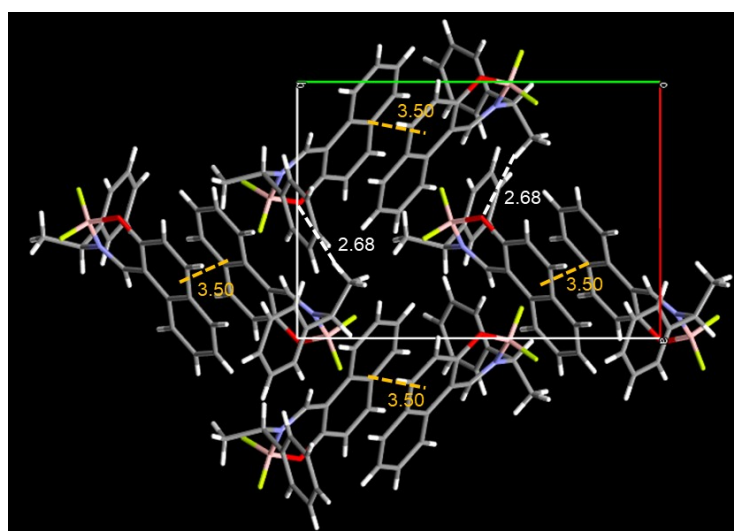

**Fig. S10** Packing structure of (*S*)-**1b**. The *c*-axis projections showing  $\pi$ - $\pi$  (orange broken lines) and H $\cdots$ O (white broken lines) interactions.

broken lines) interactions.

(a)

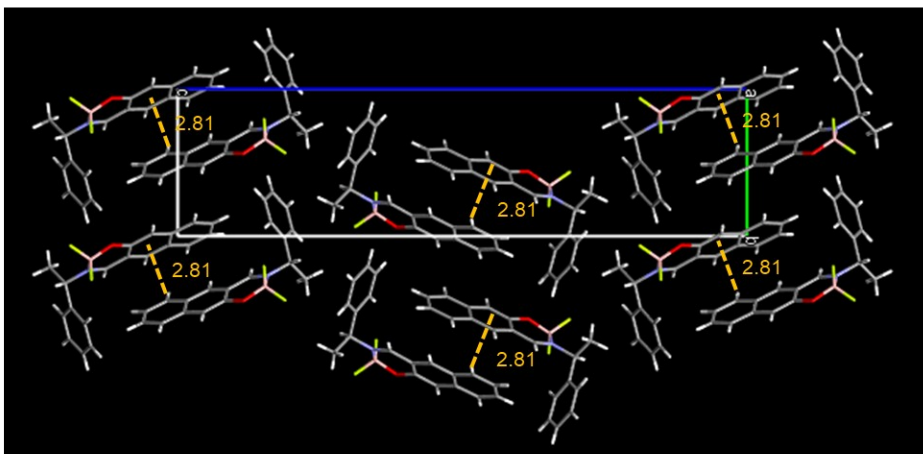

(b)

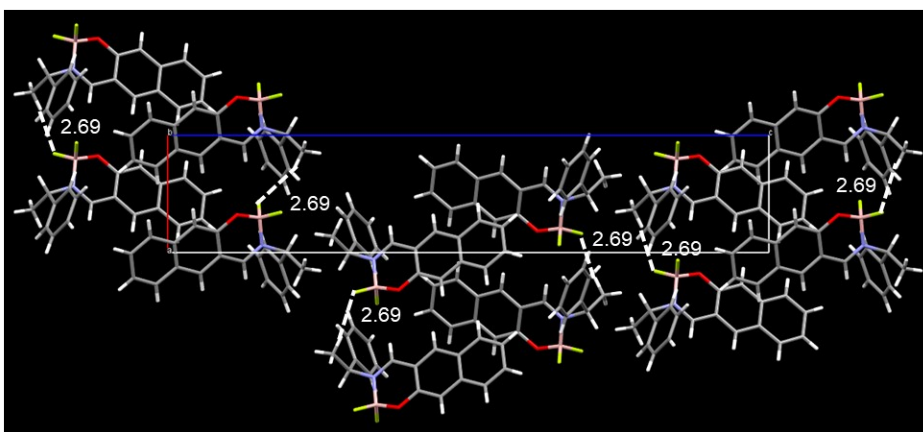

**Fig. S11** Packing structure of (*S*)-**1c**. (a) The *a*-axis and (b) *b*-axis projections showing CH- $\pi$  (orange broken lines) and H··F (white broken lines) interactions.

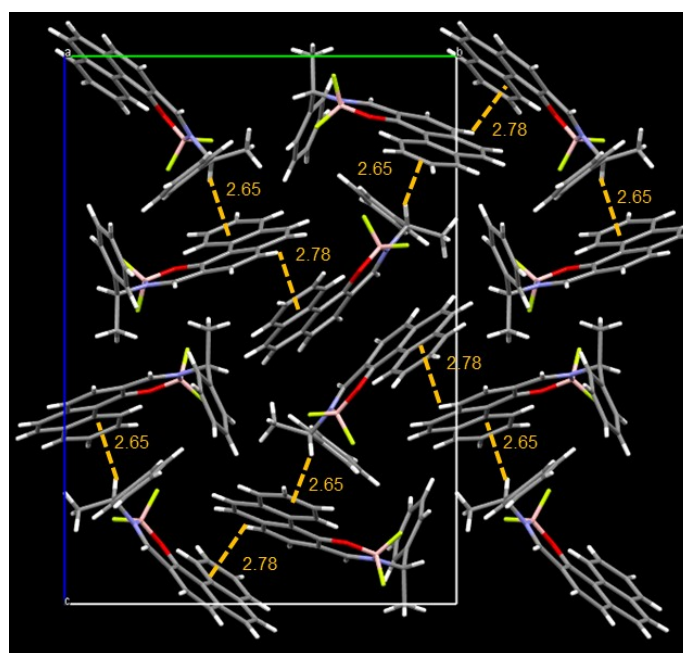

**Fig. S12** Packing structure of (*S*)-**1d**. The *a*-axis projections showing CH- $\pi$  (orange broken lines) interactions.**Table S1.** Crystal data and structural refinement details for complexes (*S*)-**1a–d**.

|                                                                            | ( <i>S</i> )- <b>1a</b>                            | ( <i>S</i> )- <b>1b</b>                               | ( <i>S</i> )- <b>1c</b>                                     | ( <i>S</i> )- <b>1d</b>                                     |
|----------------------------------------------------------------------------|----------------------------------------------------|-------------------------------------------------------|-------------------------------------------------------------|-------------------------------------------------------------|
| Formula                                                                    | C <sub>19</sub> H <sub>16</sub> BF <sub>2</sub> NO | 2(C <sub>19</sub> H <sub>16</sub> BF <sub>2</sub> NO) | C <sub>19</sub> H <sub>16</sub> BF <sub>2</sub> NO          | C <sub>23</sub> H <sub>18</sub> BF <sub>2</sub> NO          |
| <i>M<sub>F</sub></i>                                                       | 323.14                                             | 646.27                                                | 323.14                                                      | 373.19                                                      |
| <i>T</i> [K]                                                               | 173.15                                             | 173.15                                                | 173.15                                                      | 173.15                                                      |
| Crystal color, habit                                                       | colorless, plate                                   | colorless, block                                      | yellow, needle                                              | colorless, plate                                            |
| Crystal size [mm]                                                          | 0.456×0.125×0.058                                  | 0.408×0.375×0.305                                     | 0.25×0.05×0.02                                              | 0.455×0.412×0.26                                            |
| Crystal system                                                             | monoclinic                                         | monoclinic                                            | orthorhombic                                                | orthorhombic                                                |
| Space group                                                                | <i>P</i> 2 <sub>1</sub> (#4)                       | <i>P</i> 2 <sub>1</sub> (#4)                          | <i>P</i> 2 <sub>1</sub> 2 <sub>1</sub> 2 <sub>1</sub> (#19) | <i>P</i> 2 <sub>1</sub> 2 <sub>1</sub> 2 <sub>1</sub> (#19) |
| <i>a</i> [Å]                                                               | 8.7506(8)                                          | 10.3730(4)                                            | 6.1678(14)                                                  | 9.7997(5)                                                   |
| <i>b</i> [Å]                                                               | 6.4046(6)                                          | 13.9191(4)                                            | 8.1722(13)                                                  | 16.3983(8)                                                  |
| <i>c</i> [Å]                                                               | 14.9030(14)                                        | 11.5437(4)                                            | 31.570(5)                                                   | 22.9360(11)                                                 |
| $\alpha$ [°]                                                               | 90                                                 | 90                                                    | 90                                                          | 90                                                          |
| $\beta$ [°]                                                                | 101.334(8)                                         | 108.664(4)                                            | 90                                                          | 90                                                          |
| $\gamma$ [°]                                                               | 90                                                 | 90                                                    | 90                                                          | 90                                                          |
| <i>V</i> [Å <sup>3</sup> ]                                                 | 818.94(13)                                         | 1579.06(10)                                           | 1591.3(5)                                                   | 3685.8(3)                                                   |
| <i>Z</i>                                                                   | 2                                                  | 2                                                     | 4                                                           | 8                                                           |
| <i>D</i> <sub>calcd</sub> [g cm <sup>-3</sup> ]                            | 1.310                                              | 1.359                                                 | 1.349                                                       | 1.345                                                       |
| Abs coeff (mm <sup>-1</sup> )                                              | 0.095                                              | 0.099                                                 | 0.098                                                       | 0.095                                                       |
| Abs correct                                                                | multi-scan                                         | multi-scan                                            | multi-scan                                                  | multi-scan                                                  |
| Transmiss max/min                                                          | 1.0000/0.58274                                     | 1.0000/0.96113                                        | 1.0000/0.24387                                              | 1.0000/0.92835                                              |
| <i>F</i> (000)                                                             | 336                                                | 672                                                   | 672                                                         | 1552                                                        |
| $\theta$ range (°)                                                         | 4.748–60.886                                       | 4.144–60.998                                          | 5.148–61.086                                                | 4.334–60.712                                                |
| Rflns/unique                                                               | 15183/4710                                         | 27219/9216                                            | 14957/4620                                                  | 38018/10595                                                 |
| <i>R</i> <sub>int</sub>                                                    | 0.0698                                             | 0.0347                                                | 0.1352                                                      | 0.0360                                                      |
| Data/params                                                                | 4710/1/218                                         | 9216/1/435                                            | 4620/32/218                                                 | 10595/0/507                                                 |
| Largest diff. peak and hole (e <sup>−</sup> Å <sup>-3</sup> )              | 0.15/−0.19                                         | 0.16/−0.23                                            | 0.27/−0.25                                                  | 0.84/−0.56                                                  |
| <i>R</i> <sub>1</sub> ( <i>I</i> > 2 $\sigma$ ( <i>I</i> )) <sup>[a]</sup> | 0.0508                                             | 0.0472                                                | 0.1104                                                      | 0.0591                                                      |
| <i>wR</i> <sub>2</sub> (all reflections) <sup>[b]</sup>                    | 0.1039                                             | 0.0964                                                | 0.1265                                                      | 0.1493                                                      |
| Goodness of fit                                                            | 0.957                                              | 0.981                                                 | 1.004                                                       | 1.049                                                       |
| Flack Parameter                                                            | 0.2(6)                                             | 0.4(3)                                                | 0.3(10)                                                     | 0.1(3)                                                      |
| CCDC No.                                                                   | 21511184                                           | 21511185                                              | 21511186                                                    | 21511187                                                    |

[a]  $R_1 = \Sigma(|F_o| - |F_c|) / \Sigma(|F_o|)$ . [b]  $wR_2 = [\Sigma(w(F_o^2 - F_c^2)^2) / \Sigma(wF_o^2)]^{1/2}$ .





#### 4. Chiroptical Properties

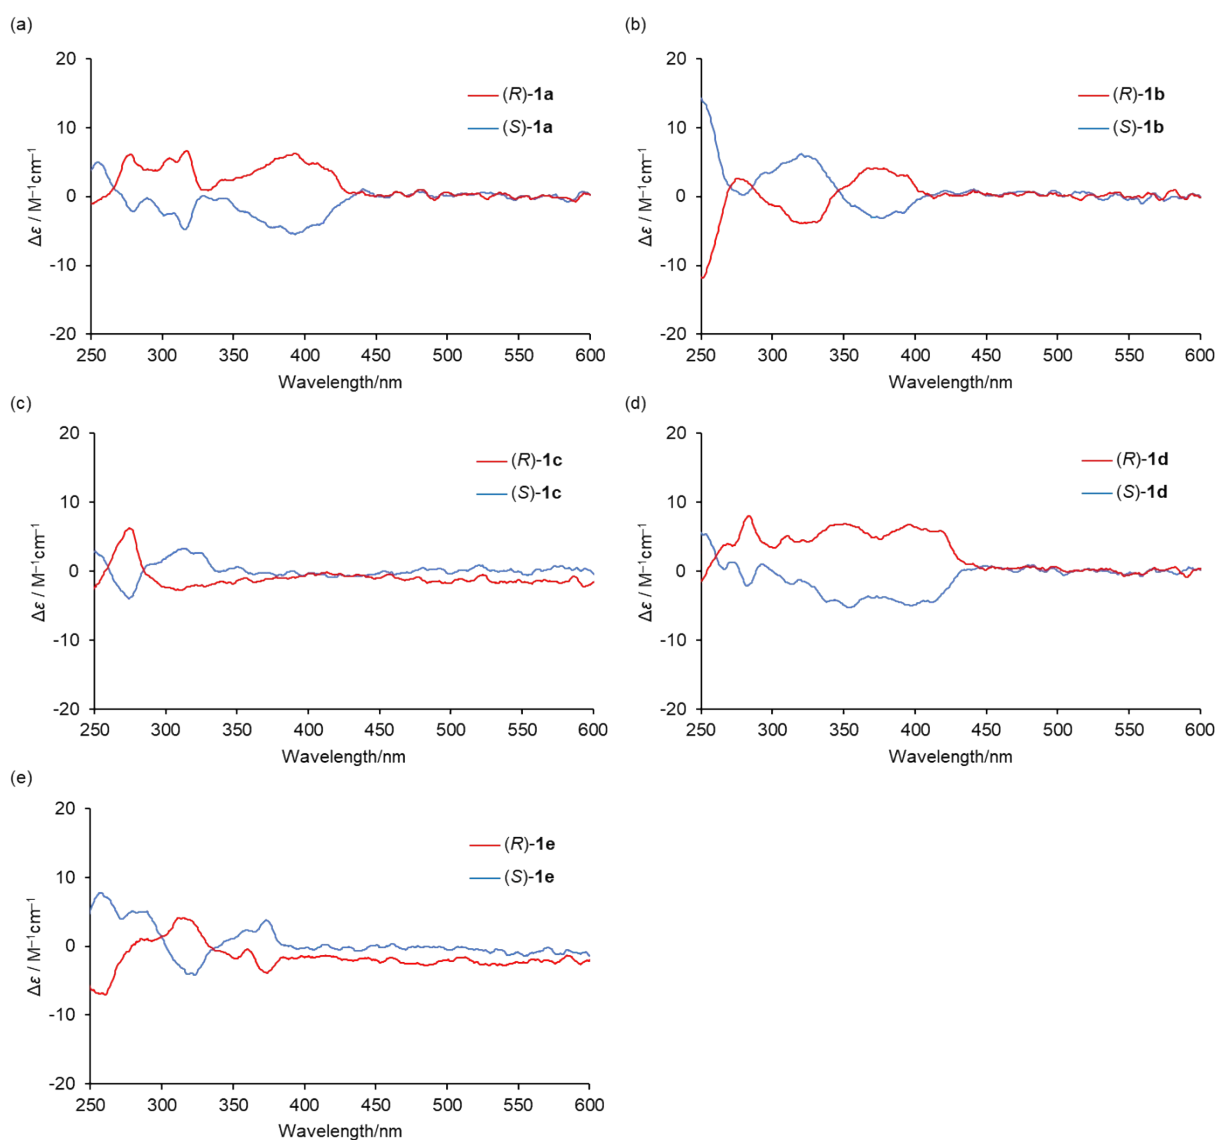

**Fig. S13** CD spectra for  $2.0 \times 10^{-4}$  M solutions of (a) **1a**, (b) **1b**, (c) **1c**, (d) **1d** and (e) **1e** in  $\text{CH}_2\text{Cl}_2$  at 298 K.

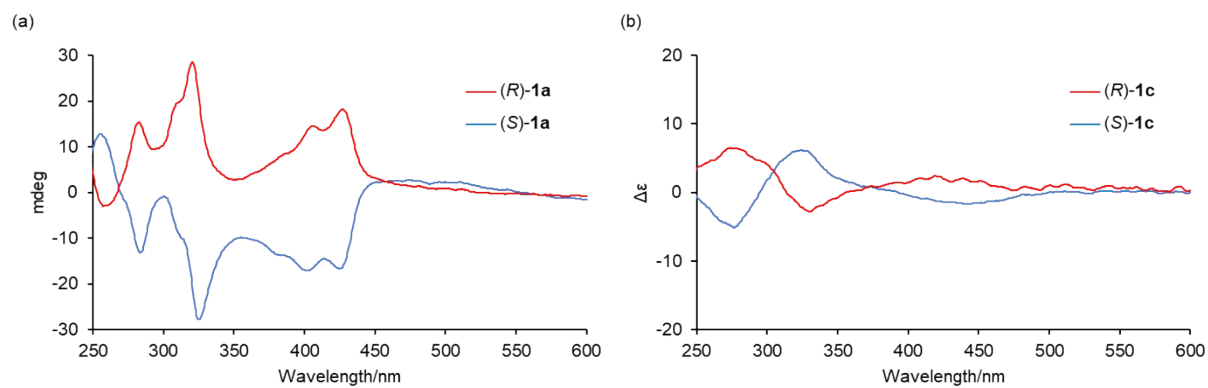

**Fig. S14** CD spectra of (a) **1a** and (b) **1c** in the drop-cast film state at 298 K.

## 5. Computational Methods

All calculations were carried out based on DFT with the B3LYP exchange-correlation functional, using the Gaussian 16W program package.<sup>S5</sup> The basis set used was 6-31+G(d,p) for all atoms. Molecular orbitals and their eigenvalues for **1a–e** were estimated using the optimized geometries determined by the DFT calculations using initial geometries obtained from XRD analysis. The singlet–singlet ( $E(S_n)$ ) transition energies were estimated by time-dependent (TD) DFT calculation (B3LYP/6-31+G(d,p)).

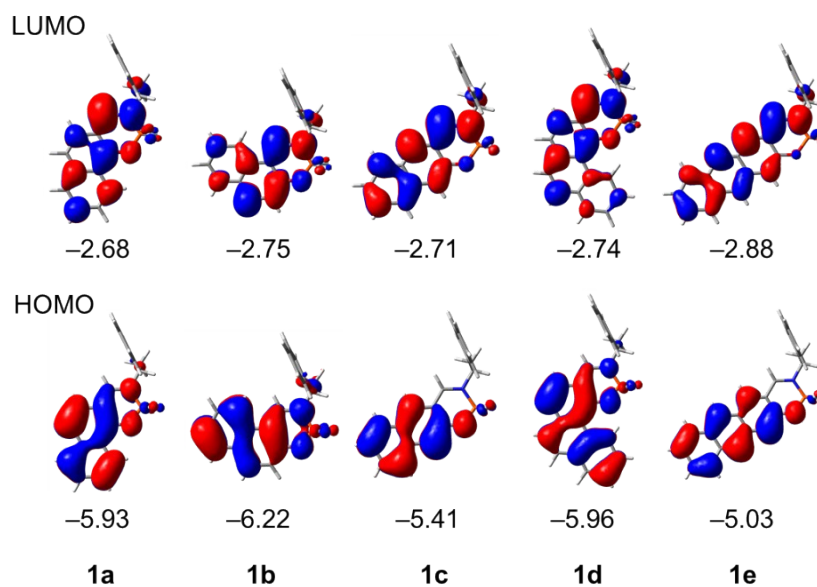

**Fig. S15** Molecular orbitals (overhead views) and eigenvalues [eV] for the frontier orbitals of **1a–e** estimated from DFT calculations (B3LYP/6-31+G(d,p)) on the basis of the optimized geometries in the  $S_1$  excited states.

Table S2. Selected data for excitation energy, major configuration, coefficient, and oscillator strength for **1** (for the geometries optimized in the S<sub>0</sub> state).<sup>[a]</sup>

| Compound       | State          | Excitation energy (eV) | Major configuration <sup>[b]</sup> | Coefficient | Oscillator strength |
|----------------|----------------|------------------------|------------------------------------|-------------|---------------------|
| (S)- <b>1a</b> | S <sub>1</sub> | 3.22 (385 nm)          | HOMO→LUMO                          | 0.693       | 0.1362              |
| (S)- <b>1b</b> | S <sub>1</sub> | 3.41 (364 nm)          | HOMO→LUMO                          | 0.698       | 0.1775              |
| (S)- <b>1c</b> | S <sub>1</sub> | 2.83 (439 nm)          | HOMO→LUMO                          | 0.700       | 0.0297              |
| (S)- <b>1d</b> | S <sub>1</sub> | 3.15 (394 nm)          | HOMO→LUMO                          | 0.631       | 0.1675              |
| (S)- <b>1e</b> | S <sub>1</sub> | 2.26 (549 nm)          | HOMO→LUMO                          | 0.699       | 0.0272              |

[a] Estimated by TD-DFT (B3LYP/6-31+G(d,p)) calculations based on the optimized geometries. [b] Molecular orbitals are shown in Fig. 8.

Table S3. Selected data for excitation energy, major configuration, coefficient, and oscillator strength for **1** (for the geometries optimized in the S<sub>1</sub> state).<sup>[a]</sup>

| Compound       | State          | Excitation energy (eV) | Major configuration <sup>[b]</sup> | Coefficient | Oscillator strength |
|----------------|----------------|------------------------|------------------------------------|-------------|---------------------|
| (S)- <b>1a</b> | S <sub>1</sub> | 2.82 (440 nm)          | HOMO→LUMO                          | 0.699       | 0.1099              |
| (S)- <b>1b</b> | S <sub>1</sub> | 3.10 (401 nm)          | HOMO→LUMO                          | 0.700       | 0.1638              |
| (S)- <b>1c</b> | S <sub>1</sub> | 2.16 (574 nm)          | HOMO→LUMO                          | 0.705       | 0.0236              |
| (S)- <b>1d</b> | S <sub>1</sub> | 2.74 (453 nm)          | HOMO→LUMO                          | 0.684       | 0.0785              |
| (S)- <b>1e</b> | S <sub>1</sub> | 1.67 (740 nm)          | HOMO→LUMO                          | 0.705       | 0.0169              |

[a] Estimated by TD-DFT (B3LYP/6-31+G(d,p)) calculations based on the optimized geometries. [b] Molecular orbitals are shown in Fig. S15.

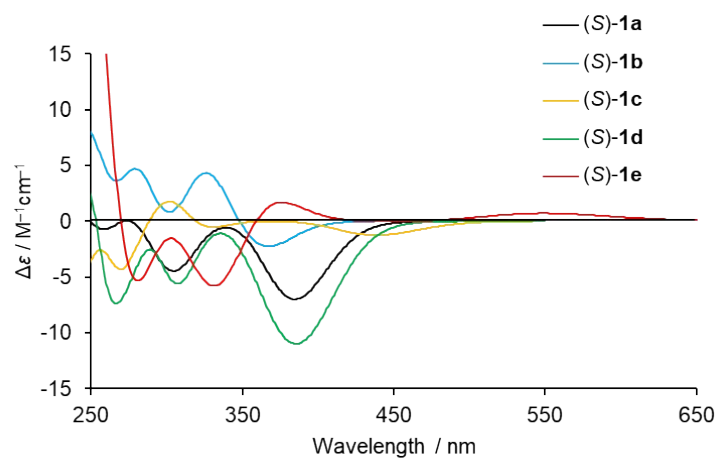

**Fig. S16** Theoretical CD spectra of (*S*)-**1a–e** estimated by TD-DFT calculation (B3LYP/6-31+G(d,p)).

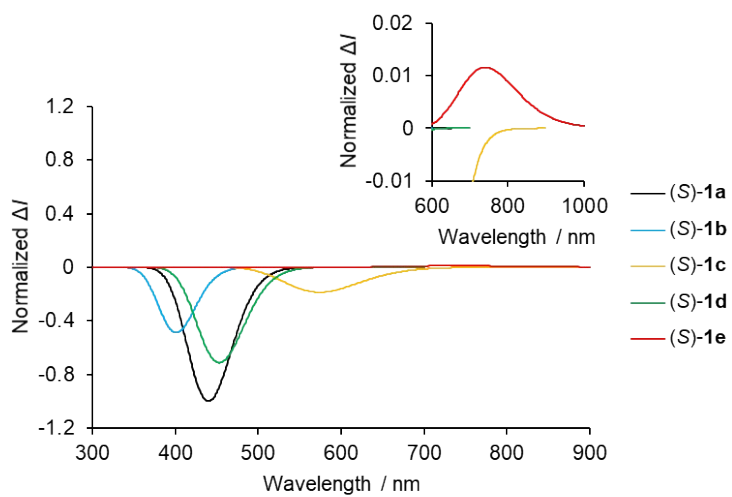

**Fig. S17** Theoretical CPL spectra of (*S*)-**1a–e** estimated by TD-DFT calculation (B3LYP/6-31+G(d,p)). The insets show the enlarged spectra.

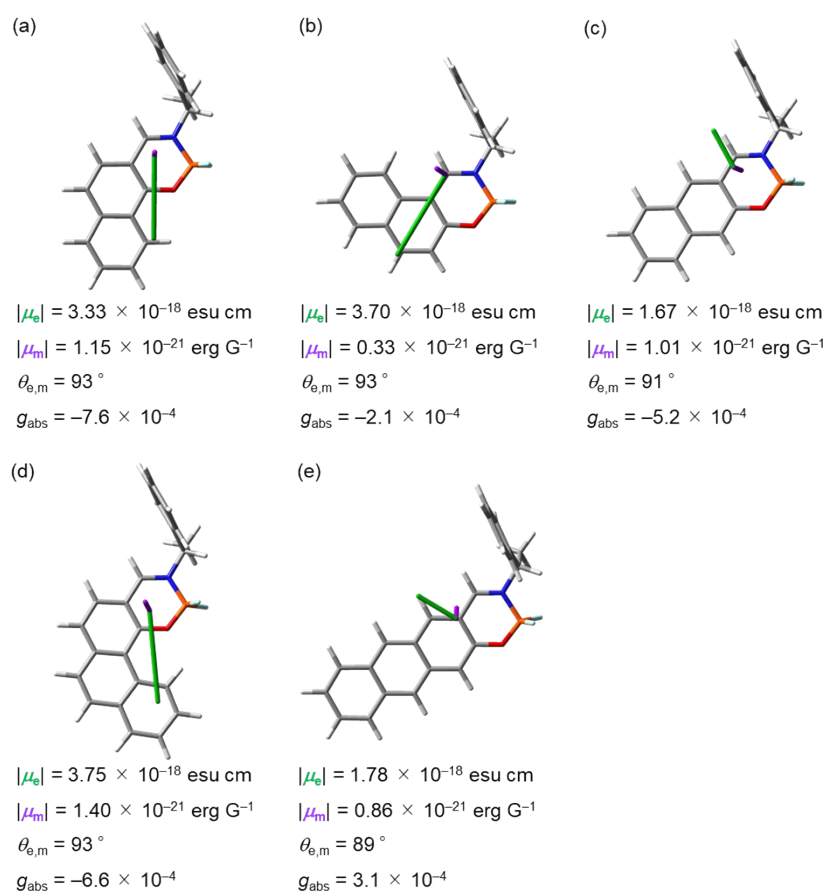

**Fig. S18** Electric ( $\mu_e$ , orange) and magnetic ( $\mu_m$ , purple) dipole moments of the  $S_0 \rightarrow S_1$  transition for (a) (*S*)-**1a**, (b) (*S*)-**1b**, (c) (*S*)-**1c**, (d) (*S*)-**1d** and (e) (*S*)-**1e** calculated at the B3LYP/6-31+G(d,p) level. Calculated values of transition dipole moments ( $|\mu_e|$ ,  $|\mu_m|$ , and  $\theta_{e,m}$ ) and  $g_{\text{abs}}$  are given under each structure.

## 6. Cartesian Coordinates (in Å)

Table S4. Cartesian coordinates (in angstrom) of (*S*)-**1a** in  $S_0$  state<sup>[a]</sup>.

| atom | x         | y         | z         |
|------|-----------|-----------|-----------|
| F    | -0.525698 | 2.095979  | 1.557689  |
| O    | 1.299079  | 1.459622  | 0.20891   |
| F    | -0.256406 | 3.056599  | -0.514982 |
| N    | -1.022627 | 0.766223  | -0.378472 |
| C    | 0.814641  | -0.767151 | -0.477971 |
| C    | 1.709178  | 0.235578  | -0.052356 |
| C    | -0.556457 | -0.4217   | -0.641963 |
| H    | -1.250402 | -1.182198 | -1.00041  |
| C    | 3.106564  | -0.065506 | 0.085886  |
| C    | 3.557235  | -1.390914 | -0.204933 |
| C    | 1.295581  | -2.08455  | -0.760909 |
| H    | 0.583687  | -2.839787 | -1.083962 |
| C    | 2.620486  | -2.390002 | -0.628701 |
| H    | 2.982136  | -3.391028 | -0.842996 |
| C    | 4.938172  | -1.675189 | -0.061557 |
| H    | 5.291586  | -2.679391 | -0.27952  |
| C    | 4.031768  | 0.921319  | 0.505368  |
| H    | 3.664298  | 1.918124  | 0.721912  |
| C    | 5.825542  | -0.697378 | 0.347735  |
| H    | 6.880425  | -0.934899 | 0.451578  |
| C    | 5.371463  | 0.610265  | 0.633566  |
| H    | 6.07787   | 1.369288  | 0.95532   |
| B    | -0.109127 | 1.899504  | 0.240031  |
| C    | -2.461468 | 1.102045  | -0.614489 |
| H    | -2.621909 | 2.011126  | -0.029535 |
| C    | -2.667884 | 1.454761  | -2.092386 |
| H    | -1.991776 | 2.266855  | -2.367817 |
| H    | -2.46438  | 0.60093   | -2.747506 |
| H    | -3.697058 | 1.784879  | -2.262752 |
| C    | -3.383909 | 0.02499   | -0.049883 |
| C    | -4.181292 | -0.795985 | -0.856532 |
| H    | -4.172365 | -0.679441 | -1.935459 |
| C    | -3.438066 | -0.142969 | 1.344545  |
| H    | -2.823623 | 0.490464  | 1.97952   |
| C    | -5.05418  | -1.929429 | 1.099543  |
| H    | -5.700324 | -2.681513 | 1.5428    |
| C    | -4.26332  | -1.111381 | 1.914565  |
| H    | -4.294199 | -1.224634 | 2.994374  |
| C    | -5.011932 | -1.767942 | -0.285387 |
| H    | -5.626366 | -2.393212 | -0.926886 |

[a] The geometry was optimized by DFT calculation (B3LYP/6-31+G (d,p)).

Table S5. Cartesian coordinates (in angstrom) of (*S*)-**1b** in S<sub>0</sub> state<sup>[a]</sup>.

| atom | x         | y         | z         |
|------|-----------|-----------|-----------|
| F    | -1.120361 | -2.603597 | -1.516266 |
| F    | -1.107032 | -3.477998 | 0.612124  |
| O    | 0.889832  | -2.642146 | -0.280121 |
| N    | -0.938303 | -1.081368 | 0.329031  |
| C    | 1.323957  | -0.319214 | 0.082801  |
| C    | -0.051854 | -0.127525 | 0.398837  |
| H    | -0.398258 | 0.850397  | 0.723765  |
| C    | 2.293252  | 0.757003  | 0.124897  |
| C    | 1.737206  | -1.634275 | -0.225661 |
| C    | -2.357975 | -0.843287 | 0.736422  |
| H    | -2.90935  | -1.664725 | 0.271916  |
| C    | 3.667273  | 0.444822  | -0.118647 |
| C    | 1.958779  | 2.109528  | 0.386233  |
| H    | 0.926743  | 2.397565  | 0.554671  |
| C    | -2.89573  | 0.459485  | 0.150228  |
| C    | -3.056002 | 0.547947  | -1.24345  |
| H    | -2.789218 | -0.30434  | -1.863543 |
| C    | -3.545413 | 1.712883  | -1.832572 |
| H    | -3.66521  | 1.761534  | -2.91101  |
| C    | 4.641772  | 1.472451  | -0.080509 |
| H    | 5.680224  | 1.211945  | -0.268148 |
| C    | -3.243974 | 1.563935  | 0.93735   |
| H    | -3.145781 | 1.520128  | 2.01724   |
| C    | -3.887816 | 2.812671  | -1.037389 |
| H    | -4.273084 | 3.719185  | -1.495008 |
| C    | 4.286335  | 2.779773  | 0.18639   |
| H    | 5.039566  | 3.560929  | 0.212979  |
| C    | 2.931145  | 3.093914  | 0.418714  |
| H    | 2.643006  | 4.12156   | 0.620213  |
| C    | -3.73743  | 2.734178  | 0.347199  |
| H    | -4.006529 | 3.579378  | 0.974334  |
| C    | -2.485706 | -0.997515 | 2.256708  |
| H    | -1.905452 | -0.23892  | 2.792912  |
| H    | -3.533568 | -0.911625 | 2.559718  |
| H    | -2.118161 | -1.982526 | 2.551713  |
| C    | 4.035293  | -0.907794 | -0.402895 |
| H    | 5.084396  | -1.127321 | -0.584653 |
| C    | 3.113288  | -1.917082 | -0.457585 |
| H    | 3.390821  | -2.94181  | -0.67851  |
| B    | -0.576506 | -2.512327 | -0.233197 |

[a] The geometry was optimized by DFT calculation (B3LYP/6-31+G(d,p)).

Table S6. Cartesian coordinates (in angstrom) of (S)-**1c** in S<sub>0</sub> state<sup>[a]</sup>.

| atom | x         | y         | z         |
|------|-----------|-----------|-----------|
| F    | 1.113634  | 3.297722  | 0.477342  |
| F    | 1.30166   | 2.276346  | -1.570889 |
| O    | -0.762713 | 2.232249  | -0.430029 |
| N    | 1.199441  | 0.900003  | 0.369048  |
| C    | -1.811476 | -1.144898 | 0.545885  |
| H    | -1.376153 | -2.061769 | 0.937474  |
| C    | -3.191956 | -1.091182 | 0.288603  |
| C    | 0.414413  | -0.103815 | 0.590779  |
| H    | 0.835696  | -1.024979 | 0.995539  |
| C    | -1.537835 | 1.177066  | -0.209261 |
| C    | 3.289557  | -0.427661 | 0.135504  |
| C    | -0.989241 | -0.046577 | 0.308953  |
| C    | -2.899162 | 1.24455   | -0.46259  |
| H    | -3.307895 | 2.171448  | -0.851074 |
| C    | 2.655753  | 0.838612  | 0.697552  |
| H    | 3.082029  | 1.688191  | 0.159793  |
| C    | -3.742698 | 0.137299  | -0.226244 |
| C    | 3.848717  | -1.425545 | 0.939369  |
| H    | 3.851895  | -1.320582 | 2.019532  |
| C    | 3.315972  | -0.585583 | -1.2601   |
| H    | 2.876807  | 0.188358  | -1.884432 |
| C    | 2.844746  | 1.09248   | 2.195712  |
| H    | 2.376683  | 2.044496  | 2.453214  |
| H    | 3.909091  | 1.147781  | 2.440588  |
| H    | 2.389152  | 0.304889  | 2.80482   |
| C    | -5.143016 | 0.187632  | -0.48379  |
| H    | -5.568005 | 1.108728  | -0.872196 |
| C    | 4.423176  | -2.562719 | 0.362228  |
| H    | 4.856667  | -3.327865 | 0.999673  |
| C    | -4.053858 | -2.201953 | 0.520858  |
| H    | -3.624448 | -3.12197  | 0.909003  |
| C    | -5.398268 | -2.113709 | 0.260014  |
| H    | -6.049196 | -2.963683 | 0.43908   |
| C    | 3.886373  | -1.718062 | -1.833938 |
| H    | 3.901808  | -1.824991 | -2.91459  |
| C    | -5.94392  | -0.903747 | -0.247678 |
| H    | -7.009325 | -0.844682 | -0.450639 |
| C    | 4.442785  | -2.711892 | -1.022713 |
| H    | 4.8909    | -3.594054 | -1.470362 |
| B    | 0.694377  | 2.252855  | -0.322292 |

[a] The geometry was optimized by DFT calculation (B3LYP/6-31+G(d,p)).



Table S7. Cartesian coordinates (in angstrom) of (S)-**1d** in S<sub>0</sub> state<sup>[a]</sup>.

| atom | x         | y         | z         |
|------|-----------|-----------|-----------|
| O    | -0.711719 | -1.054567 | -0.123207 |
| F    | 0.6556    | -2.787444 | -0.894841 |
| F    | 0.900185  | -2.060303 | 1.273107  |
| N    | 1.711145  | -0.648818 | -0.487454 |
| C    | -0.968544 | 0.237926  | -0.220196 |
| C    | -3.484747 | -0.129507 | 0.119799  |
| C    | -3.439761 | -1.543556 | 0.252672  |
| H    | -2.493814 | -2.054614 | 0.183765  |
| C    | -2.317184 | 0.721531  | -0.110603 |
| C    | 3.101244  | -1.154402 | -0.70732  |
| H    | 3.107744  | -2.133842 | -0.222186 |
| C    | 1.421006  | 0.614187  | -0.610701 |
| H    | 2.228621  | 1.309931  | -0.838581 |
| C    | 0.1043    | 1.135873  | -0.458924 |
| C    | -0.129767 | 2.530687  | -0.577272 |
| H    | 0.710405  | 3.196281  | -0.756717 |
| C    | -2.499542 | 2.134347  | -0.233013 |
| C    | -4.773995 | 0.491424  | 0.218704  |
| C    | -3.810041 | 2.697647  | -0.124859 |
| H    | -3.916315 | 3.774424  | -0.220355 |
| C    | -4.589889 | -2.285724 | 0.469365  |
| H    | -4.509388 | -3.364617 | 0.565398  |
| C    | 4.131156  | -0.282401 | 0.005685  |
| C    | -5.931155 | -0.293044 | 0.440876  |
| H    | -6.891912 | 0.210551  | 0.510978  |
| C    | -1.402381 | 3.015795  | -0.462541 |
| H    | -1.600558 | 4.079726  | -0.546243 |
| C    | -5.848807 | -1.665675 | 0.56602   |
| H    | -6.742551 | -2.258555 | 0.736423  |
| C    | 5.070684  | 0.500523  | -0.676067 |
| H    | 5.099154  | 0.501964  | -1.760924 |
| C    | -4.899221 | 1.910265  | 0.092107  |
| H    | -5.889396 | 2.351463  | 0.172436  |
| C    | 3.331869  | -1.374572 | -2.207259 |
| H    | 2.567551  | -2.051261 | -2.595099 |
| H    | 4.314677  | -1.824485 | -2.377089 |
| H    | 3.277402  | -0.436248 | -2.769517 |
| B    | 0.614816  | -1.689414 | -0.043172 |
| C    | 4.138393  | -0.272689 | 1.411176  |
| H    | 3.413381  | -0.8778   | 1.949924  |
| C    | 5.995656  | 1.28074   | 0.028605  |
| H    | 6.719731  | 1.878842  | -0.517293 |

|   |          |          |          |
|---|----------|----------|----------|
| C | 5.990795 | 1.286601 | 1.423545 |
| H | 6.709801 | 1.889747 | 1.970223 |

---

[a] The geometry was optimized by DFT calculation (B3LYP/6-31+G(d,p)).

Table S8. Cartesian coordinates (in angstrom) of (S)-1e in S<sub>0</sub> state<sup>[a]</sup>.

| atom | x         | y         | z         |
|------|-----------|-----------|-----------|
| F    | -2.670913 | -3.233049 | 0.547445  |
| F    | -2.652756 | -2.242514 | -1.52474  |
| O    | -0.630177 | -2.509374 | -0.336386 |
| N    | -2.366258 | -0.855448 | 0.386587  |
| C    | 0.913166  | 0.705449  | 0.521499  |
| H    | 0.620611  | 1.691498  | 0.875762  |
| C    | 2.280332  | 0.436904  | 0.279264  |
| C    | -1.437724 | 0.021768  | 0.583743  |
| H    | -1.712183 | 1.01039   | 0.954128  |
| C    | 0.304132  | -1.579855 | -0.154152 |
| C    | -4.222188 | 0.776472  | 0.104166  |
| C    | -0.057322 | -0.261372 | 0.316411  |
| C    | 1.632295  | -1.862794 | -0.391311 |
| H    | 1.897049  | -2.854892 | -0.741337 |
| C    | -3.797668 | -0.561198 | 0.696713  |
| H    | -4.346367 | -1.345321 | 0.170618  |
| C    | 2.645908  | -0.886704 | -0.188019 |
| C    | -4.626318 | 1.865019  | 0.882867  |
| H    | -4.654508 | 1.783692  | 1.9647    |
| C    | -4.212264 | 0.908261  | -1.294383 |
| H    | -3.89326  | 0.063146  | -1.899132 |
| C    | -4.035215 | -0.752387 | 2.197358  |
| H    | -3.72299  | -1.760209 | 2.477364  |
| H    | -5.097093 | -0.63668  | 2.431547  |
| H    | -3.467152 | -0.032913 | 2.796108  |
| C    | 4.002753  | -1.154361 | -0.42622  |
| H    | 4.290473  | -2.142129 | -0.776948 |
| C    | -5.012859 | 3.065462  | 0.278052  |
| H    | -5.327779 | 3.901226  | 0.896125  |
| C    | 3.277115  | 1.406549  | 0.480066  |
| H    | 2.989153  | 2.39515   | 0.830525  |
| C    | 4.624447  | 1.131418  | 0.240649  |
| C    | -4.595422 | 2.103539  | -1.895765 |
| H    | -4.585214 | 2.189672  | -2.978324 |
| C    | 4.994918  | -0.188465 | -0.225974 |
| C    | -4.99778  | 3.187735  | -1.109582 |
| H    | -5.30012  | 4.119354  | -1.578706 |
| B    | -2.069942 | -2.291847 | -0.264865 |
| C    | 6.379254  | -0.457897 | -0.467407 |
| H    | 6.660933  | -1.447136 | -0.817701 |
| C    | 5.651889  | 2.107404  | 0.440279  |
| H    | 5.366371  | 3.095898  | 0.790498  |

|   |          |          |          |
|---|----------|----------|----------|
| C | 6.964163 | 1.806055 | 0.196677 |
| H | 7.735535 | 2.554264 | 0.351524 |

---

[a] The geometry was optimized by DFT calculation (B3LYP/6-31+G(d,p)).

Table S9. Cartesian coordinates (in angstrom) of (S)-**1a** in S<sub>1</sub> state<sup>[a]</sup>.

| atom | x         | y         | z         |
|------|-----------|-----------|-----------|
| F    | 0.530165  | 1.964817  | 1.577399  |
| O    | -1.284564 | 1.453445  | 0.173615  |
| F    | 0.311491  | 3.049884  | -0.440419 |
| N    | 1.049706  | 0.748891  | -0.440521 |
| C    | -0.817638 | -0.766441 | -0.561254 |
| C    | -1.713003 | 0.238127  | -0.092376 |
| C    | 0.577844  | -0.46728  | -0.748359 |
| H    | 1.258952  | -1.233724 | -1.101359 |
| C    | -3.1108   | -0.043846 | 0.080847  |
| C    | -3.620082 | -1.360944 | -0.219763 |
| C    | -1.347292 | -2.029109 | -0.837854 |
| H    | -0.680116 | -2.808912 | -1.19709  |
| C    | -2.719497 | -2.336919 | -0.675148 |
| H    | -3.072392 | -3.337206 | -0.90679  |
| C    | -5.007546 | -1.629898 | -0.045063 |
| H    | -5.376258 | -2.626071 | -0.274676 |
| C    | -4.009816 | 0.933814  | 0.540265  |
| H    | -3.631876 | 1.923857  | 0.769652  |
| C    | -5.875548 | -0.646408 | 0.408842  |
| H    | -6.930908 | -0.860651 | 0.538556  |
| C    | -5.368806 | 0.635709  | 0.700559  |
| H    | -6.040988 | 1.410448  | 1.057263  |
| B    | 0.162771  | 1.840119  | 0.230891  |
| C    | 2.474385  | 1.073295  | -0.671943 |
| H    | 2.641458  | 2.006933  | -0.127182 |
| C    | 2.716751  | 1.365904  | -2.161285 |
| H    | 2.051544  | 2.17237   | -2.478166 |
| H    | 2.513272  | 0.489106  | -2.785284 |
| H    | 3.751293  | 1.681706  | -2.330074 |
| C    | 3.39698   | 0.020958  | -0.051255 |
| C    | 4.273474  | -0.769396 | -0.804081 |
| H    | 4.326725  | -0.652536 | -1.881712 |
| C    | 3.366495  | -0.152391 | 1.343327  |
| H    | 2.685244  | 0.453392  | 1.93528   |
| C    | 5.061716  | -1.877035 | 1.202545  |
| H    | 5.705557  | -2.606262 | 1.686055  |
| C    | 4.189435  | -1.090703 | 1.964556  |
| H    | 4.154251  | -1.206499 | 3.044276  |
| C    | 5.100849  | -1.713135 | -0.182099 |
| H    | 5.77664   | -2.314471 | -0.784067 |

[a] The geometry was optimized by DFT calculation (B3LYP/6-31+G (d,p)).

Table S10. Cartesian coordinates (in angstrom) of (*S*)-**1b** in S<sub>1</sub> state<sup>[a]</sup>.

| atom | x         | y         | z         |
|------|-----------|-----------|-----------|
| F    | -1.162399 | -2.572116 | -1.462523 |
| F    | -1.073053 | -3.455737 | 0.66274   |
| O    | 0.882465  | -2.615815 | -0.304247 |
| N    | -0.942559 | -1.061758 | 0.396441  |
| C    | 1.331816  | -0.296414 | 0.124441  |
| C    | -0.03918  | -0.082143 | 0.473968  |
| H    | -0.385403 | 0.892091  | 0.796026  |
| C    | 2.315803  | 0.733183  | 0.142655  |
| C    | 1.75552   | -1.63195  | -0.256192 |
| C    | -2.343913 | -0.817912 | 0.804658  |
| H    | -2.903393 | -1.665322 | 0.398118  |
| C    | 3.694276  | 0.417431  | -0.165188 |
| C    | 1.988815  | 2.0978    | 0.459327  |
| H    | 0.960028  | 2.362068  | 0.671291  |
| C    | -2.903175 | 0.447853  | 0.152356  |
| C    | -3.010568 | 0.481737  | -1.249227 |
| H    | -2.687527 | -0.382123 | -1.824575 |
| C    | -3.518228 | 1.605839  | -1.898938 |
| H    | -3.598451 | 1.610931  | -2.982328 |
| C    | 4.637528  | 1.451274  | -0.117466 |
| H    | 5.676004  | 1.220737  | -0.339574 |
| C    | -3.316932 | 1.568321  | 0.88315   |
| H    | -3.256613 | 1.56769   | 1.966768  |
| C    | -3.928755 | 2.721366  | -1.159364 |
| H    | -4.327795 | 3.59627   | -1.664592 |
| C    | 4.283713  | 2.776356  | 0.207368  |
| H    | 5.051141  | 3.543708  | 0.230613  |
| C    | 2.949993  | 3.098693  | 0.492804  |
| H    | 2.667602  | 4.117988  | 0.732805  |
| C    | -3.827054 | 2.698551  | 0.231963  |
| H    | -4.148499 | 3.556017  | 0.816778  |
| C    | -2.467104 | -0.883206 | 2.33599   |
| H    | -1.882005 | -0.096378 | 2.824112  |
| H    | -3.513446 | -0.78082  | 2.641352  |
| H    | -2.096487 | -1.850414 | 2.682386  |
| C    | 4.064947  | -0.9196   | -0.50678  |
| H    | 5.102752  | -1.139464 | -0.733962 |
| C    | 3.101783  | -1.913652 | -0.555259 |
| H    | 3.349234  | -2.935406 | -0.822022 |
| B    | -0.593116 | -2.465845 | -0.187573 |

[a] The geometry was optimized by DFT calculation (B3LYP/6-31+G(d,p)).

Table S11. Cartesian coordinates (in angstrom) of (*S*)-**1c** in S<sub>1</sub> state<sup>[a]</sup>.

| atom | x         | y         | z         |
|------|-----------|-----------|-----------|
| F    | 0.997533  | 3.261329  | 0.531807  |
| F    | 1.332141  | 2.29289   | -1.523374 |
| O    | -0.764362 | 2.115855  | -0.495017 |
| N    | 1.227323  | 0.873633  | 0.408144  |
| C    | -1.862823 | -1.142253 | 0.601697  |
| H    | -1.487081 | -2.063765 | 1.041731  |
| C    | -3.273879 | -1.074376 | 0.302183  |
| C    | 0.419043  | -0.168365 | 0.667115  |
| H    | 0.843809  | -1.075954 | 1.08061   |
| C    | -1.52853  | 1.095295  | -0.228327 |
| C    | 3.33932   | -0.399949 | 0.146567  |
| C    | -0.982921 | -0.111836 | 0.362479  |
| C    | -2.899781 | 1.192849  | -0.52954  |
| H    | -3.248648 | 2.120493  | -0.971403 |
| C    | 2.655802  | 0.814244  | 0.776759  |
| H    | 3.099974  | 1.701741  | 0.317086  |
| C    | -3.799488 | 0.124836  | -0.27465  |
| C    | 3.951183  | -1.410477 | 0.893893  |
| H    | 3.959214  | -1.359227 | 1.977925  |
| C    | 3.356938  | -0.49307  | -1.254673 |
| H    | 2.875164  | 0.288034  | -1.83657  |
| C    | 2.822861  | 0.957696  | 2.295659  |
| H    | 2.34513   | 1.886881  | 2.613688  |
| H    | 3.881096  | 0.996832  | 2.570791  |
| H    | 2.354206  | 0.129134  | 2.836283  |
| C    | -5.174329 | 0.203352  | -0.569421 |
| H    | -5.567287 | 1.116407  | -1.007544 |
| C    | 4.567976  | -2.493488 | 0.258568  |
| H    | 5.039918  | -3.268905 | 0.85555   |
| C    | -4.140663 | -2.134214 | 0.556325  |
| H    | -3.751046 | -3.049497 | 0.993582  |
| C    | -5.517197 | -2.038631 | 0.254712  |
| H    | -6.16885  | -2.880883 | 0.46389   |
| C    | 3.971216  | -1.569686 | -1.887763 |
| H    | 3.978792  | -1.6241   | -2.97275  |
| C    | -6.031176 | -0.875108 | -0.305385 |
| H    | -7.08777  | -0.797466 | -0.538876 |
| C    | 4.580118  | -2.576313 | -1.131759 |
| H    | 5.061281  | -3.415708 | -1.625509 |
| B    | 0.741329  | 2.17254   | -0.275578 |

[a] The geometry was optimized by DFT calculation (B3LYP/6-31+G(d,p)).

Table S12. Cartesian coordinates (in angstrom) of (*S*)-**1d** in S<sub>1</sub> state<sup>[a]</sup>.

| atom | x         | y         | z         |
|------|-----------|-----------|-----------|
| O    | -0.69248  | -1.019022 | -0.222558 |
| F    | 0.689707  | -2.729623 | -1.009231 |
| F    | 0.908242  | -2.025938 | 1.168704  |
| N    | 1.742095  | -0.594694 | -0.588136 |
| C    | -0.974314 | 0.263544  | -0.282436 |
| C    | -3.464059 | -0.152232 | 0.135307  |
| C    | -3.365296 | -1.577657 | 0.271532  |
| H    | -2.39768  | -2.042547 | 0.178446  |
| C    | -2.339903 | 0.713651  | -0.122034 |
| C    | 3.12594   | -1.062925 | -0.816473 |
| H    | 3.140881  | -2.088893 | -0.436768 |
| C    | 1.438683  | 0.706923  | -0.706871 |
| H    | 2.233673  | 1.418363  | -0.902223 |
| C    | 0.094722  | 1.182477  | -0.532216 |
| C    | -0.211569 | 2.53946   | -0.615632 |
| H    | 0.588903  | 3.249982  | -0.806489 |
| C    | -2.591472 | 2.144831  | -0.227135 |
| C    | -4.786875 | 0.432403  | 0.27078   |
| C    | -3.916405 | 2.667818  | -0.084632 |
| H    | -4.051074 | 3.742319  | -0.171897 |
| C    | -4.474848 | -2.362677 | 0.518281  |
| H    | -4.356825 | -3.437064 | 0.615353  |
| C    | 4.132913  | -0.263905 | 0.015486  |
| C    | -5.890625 | -0.39834  | 0.519941  |
| H    | -6.872204 | 0.057003  | 0.616973  |
| C    | -1.528739 | 3.015941  | -0.466599 |
| H    | -1.721054 | 4.081886  | -0.540761 |
| C    | -5.748988 | -1.777656 | 0.643995  |
| H    | -6.619495 | -2.397379 | 0.837866  |
| C    | 5.155038  | 0.506032  | -0.551882 |
| H    | 5.266032  | 0.558534  | -1.630133 |
| C    | -4.97853  | 1.851096  | 0.153527  |
| H    | -5.981835 | 2.251401  | 0.260617  |
| C    | 3.42379   | -1.131187 | -2.32257  |
| H    | 2.682549  | -1.773808 | -2.803248 |
| H    | 4.418069  | -1.552397 | -2.502627 |
| H    | 3.374047  | -0.142536 | -2.791185 |
| B    | 0.681174  | -1.628734 | -0.156132 |
| C    | 4.030185  | -0.314796 | 1.416366  |
| H    | 3.236227  | -0.905418 | 1.866143  |
| C    | 6.054327  | 1.211577  | 0.257791  |
| H    | 6.842298  | 1.801418  | -0.202458 |



|   |          |          |          |
|---|----------|----------|----------|
| C | 5.942289 | 1.154299 | 1.64688  |
| H | 6.641165 | 1.698679 | 2.275601 |

---

[a] The geometry was optimized by DFT calculation (B3LYP/6-31+G(d,p)).

Table S13. Cartesian coordinates (in angstrom) of (*S*)-**1e** in S<sub>1</sub> state<sup>[a]</sup>.

| atom | x         | y         | z         |
|------|-----------|-----------|-----------|
| F    | -2.521505 | -3.225929 | 0.625362  |
| F    | -2.686481 | -2.280222 | -1.459836 |
| O    | -0.596852 | -2.379362 | -0.403052 |
| N    | -2.38838  | -0.835796 | 0.432089  |
| C    | 0.949745  | 0.740422  | 0.587977  |
| H    | 0.701335  | 1.720586  | 0.989014  |
| C    | 2.328304  | 0.462658  | 0.308188  |
| C    | -1.438929 | 0.0817    | 0.659028  |
| H    | -1.732759 | 1.051465  | 1.047988  |
| C    | 0.3066    | -1.473656 | -0.168058 |
| C    | -4.291015 | 0.723512  | 0.110961  |
| C    | -0.067349 | -0.172403 | 0.375098  |
| C    | 1.647956  | -1.774277 | -0.447585 |
| H    | 1.868195  | -2.757581 | -0.849525 |
| C    | -3.795639 | -0.555569 | 0.786125  |
| H    | -4.36155  | -1.384054 | 0.350922  |
| C    | 2.681652  | -0.836572 | -0.222813 |
| C    | -4.757651 | 1.834292  | 0.81983   |
| H    | -4.782276 | 1.818902  | 1.904708  |
| C    | -4.283148 | 0.773954  | -1.292637 |
| H    | -3.913941 | -0.086227 | -1.844562 |
| C    | -3.987698 | -0.624011 | 2.306696  |
| H    | -3.649071 | -1.601053 | 2.658054  |
| H    | -5.041874 | -0.502949 | 2.573451  |
| H    | -3.408527 | 0.146596  | 2.82574   |
| C    | 4.024394  | -1.121288 | -0.498341 |
| H    | 4.284543  | -2.098471 | -0.897171 |
| C    | -5.206823 | 2.974092  | 0.144491  |
| H    | -5.567374 | 3.827578  | 0.711893  |
| C    | 3.331359  | 1.389005  | 0.528332  |
| H    | 3.073639  | 2.367902  | 0.926511  |
| C    | 4.705859  | 1.112543  | 0.251841  |
| C    | -4.730625 | 1.907272  | -1.965376 |
| H    | -4.720839 | 1.928149  | -3.051497 |
| C    | 5.057554  | -0.175242 | -0.274121 |
| C    | -5.194875 | 3.014097  | -1.247709 |
| H    | -5.545897 | 3.897981  | -1.772519 |
| B    | -2.092937 | -2.21342  | -0.208523 |
| C    | 6.414261  | -0.455227 | -0.549703 |
| H    | 6.679488  | -1.430672 | -0.948047 |
| C    | 5.722535  | 2.057217  | 0.477093  |
| H    | 5.458518  | 3.033213  | 0.875192  |

|   |          |          |          |
|---|----------|----------|----------|
| C | 7.054195 | 1.755533 | 0.196573 |
| H | 7.825006 | 2.498103 | 0.377147 |

---

[a] The geometry was optimized by DFT calculation (B3LYP/6-31+G(d,p)).

## 7. References

- [S1]. B. Legouin, M. Gayral, P. Uriac, J.-F. Cupif, N. Levoine, L. Toupet and P. van de Weghe, Molecular Tweezers: Synthesis and Formation of Host–Guest Complexes, *Eur. J. Org. Chem.*, 2010, 5503–5508.
- [S2]. A. V. Wiznycia, J. Desper and C. J. Levy, Iron(II) and zinc(II) monohelical binaphthyl salen complexes, *Chem. Commun.*, 2005, 4693–4695.
- [S3]. Đ. Skalamera, J. Veljković, L. Ptiček, M. Sambol, K. Mlinarić-Majerski and N. Basarić, Synthesis of asymmetrically disubstituted anthracenes, *Tetrahedron*, 2017, **73**, 5892–5899.
- [S4]. T. Tsuno, H. Iwabe and H. Brunner, Synthesis and structural characterization of isomeric palladium(II) complexes with chiral *N,O*-bidentate ligands, *Inorg. Chim. Acta*, 2013, **400**, 262–266.
- [S5]. Gaussian 16, Revision C.01, M. J. Frisch, G. W. Trucks, H. B. Schlegel, G. E. Scuseria, M. A. Robb, J. R. Cheeseman, G. Scalmani, V. Barone, G. A. Petersson, H. Nakatsuji, X. Li, M. Caricato, A. V. Marenich, J. Bloino, B. G. Janesko, R. Gomperts, B. Mennucci, H. P. Hratchian, J. V. Ortiz, A. F. Izmaylov, J. L. Sonnenberg, D. Williams-Young, F. Ding, F. Lipparini, F. Egidi, J. Goings, B. Peng, A. Petrone, T. Henderson, D. Ranasinghe, V. G. Zakrzewski, J. Gao, N. Rega, G. Zheng, W. Liang, M. Hada, M. Ehara, K. Toyota, R. Fukuda, J. Hasegawa, M. Ishida, T. Nakajima, Y. Honda, O. Kitao, H. Nakai, T. Vreven, K. Throssell, J. A. Montgomery, Jr., J. E. Peralta, F. Ogliaro, M. J. Bearpark, J. J. Heyd, E. N. Brothers, K. N. Kudin, V. N. Staroverov, T. A. Keith, R. Kobayashi, J. Normand, K. Raghavachari, A. P. Rendell, J. C. Burant, S. S. Iyengar, J. Tomasi, M. Cossi, J. M. Millam, M. Klene, C. Adamo, R. Cammi, J. W. Ochterski, R. L. Martin, K. Morokuma, O. Farkas, J. B. Foresman, and D. J. Fox, Gaussian, Inc., Wallingford CT, 2016.
